# Supplementary material for: Di-, tri- and tetraphosphine-substituted Fe/Se carbonyls: synthesis, characterization and electrochemical properties
Source: Royal Society of Chemistry journal article supplement (doi:10.1039/d2dt01376b), 2022-01-01
Supplement: d2dt01376b1.pdf [file d2dt01376b1.pdf]

## **Di-, tri- and tetraphosphine-substituted Fe/Se carbonyls: Synthesis, Characterization and electrochemical properties**

Shu-Fen Bai,<sup>a</sup> Xiu-Mei Du,<sup>a</sup> Wen-Jing Tian,<sup>b</sup> Hang Xu,<sup>b</sup> Ru-Fen Zhang,<sup>a</sup> Chun-Lin Ma<sup>a</sup>, Yan-Lan Wang,<sup>a</sup> Shuang Lü,<sup>c</sup> Qian-Li Li,<sup>\*a</sup> and Yu-Long Li<sup>\*b</sup>

<sup>a</sup> Institution of Functional Organic Molecules and Materials, School of Chemistry and Chemical Engineering, Liaocheng University, Liaocheng 252059, P.R. China

<sup>b</sup> College of Chemistry and Environmental Engineering, Sichuan University of Science & Engineering, Zigong 643000, P.R. China

<sup>c</sup> School of Pharmaceutical Sciences, Liaocheng University, Liaocheng 252059, P.R. China

### **Contents**

|                                                                                                                                                                                                                          |             |
|--------------------------------------------------------------------------------------------------------------------------------------------------------------------------------------------------------------------------|-------------|
| Figs. S1-S38. IR and NMR spectra for <b>1 - 7</b> .....                                                                                                                                                                  | pages 2-20  |
| Fig. 39. Plots of $i_{cat}$ ( $\mu$ A) vs [HOAc] (mM) for a solution of <b>4</b> , <b>6</b> and <b>7</b> (1.0 mM) with<br>0.1 M n-Bu <sub>4</sub> NPF <sub>6</sub> /MeCN at a scan rate of 0.1 V s <sup>-1</sup> . ..... | page 21     |
| Table S1. Crystal data and structure parameters for <b>1-3</b> .....                                                                                                                                                     | page 22     |
| Table S2. Crystal data and structure parameters for <b>4 - 7</b> .....                                                                                                                                                   | page 23     |
| Tables S3-S10. Selected distance (Å) and angles (°) for <b>1 - 7</b> .....                                                                                                                                               | pages 24-28 |

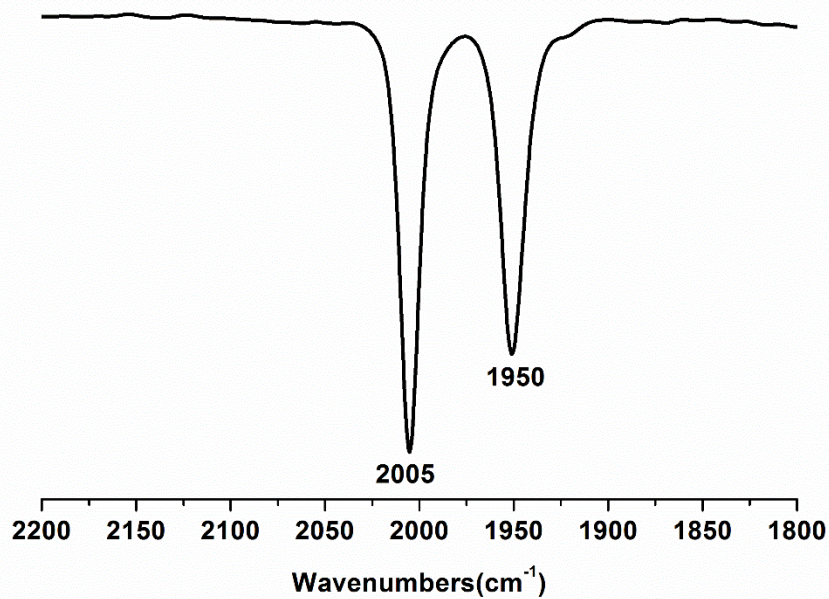

Figure S1. FT-IR (CH<sub>2</sub>Cl<sub>2</sub>, 25°C) spectrum of **1**. Assignments:  $\nu_{CO} = 2005, 1950 \text{ cm}^{-1}$ .

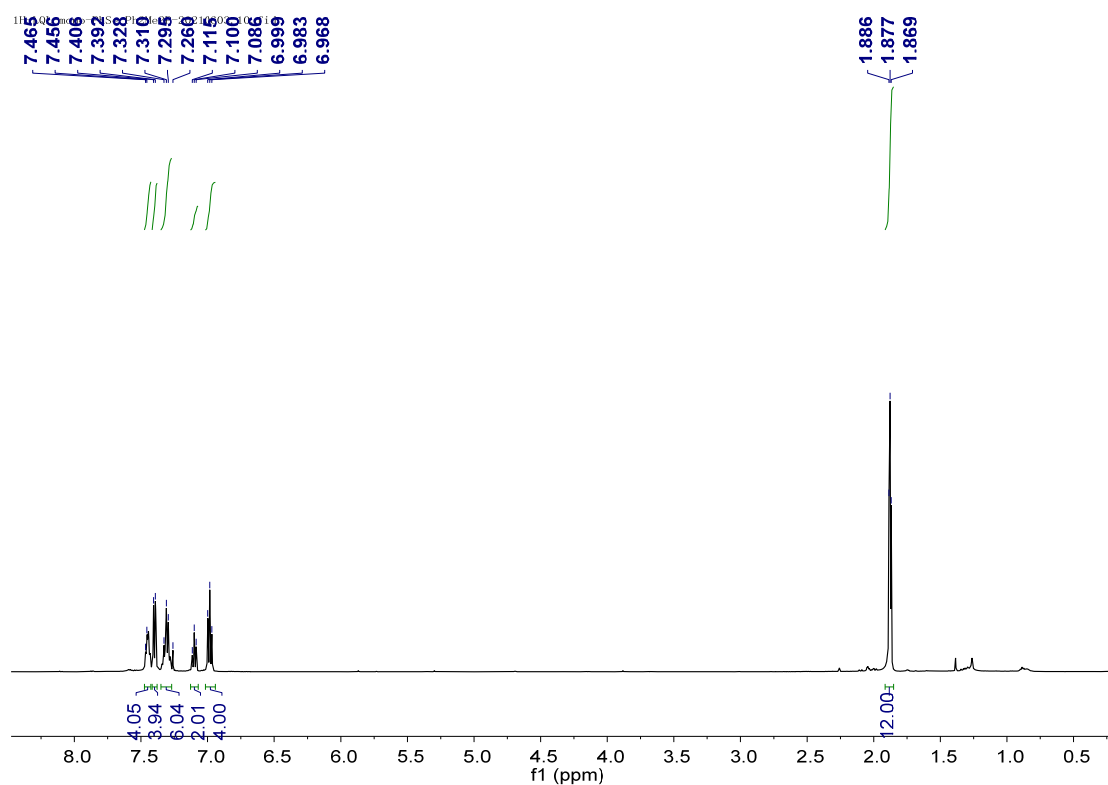

Figure S2. <sup>1</sup>H NMR (500 MHz, CDCl<sub>3</sub>, 25 °C) spectrum of **1**. Assignments:  $\delta = 7.47\text{-}6.97 \text{ (m, 20H, 4C}_6\text{H}_5\text{)}, 1.87 \text{ (t, } ^2J_{P-H} = 4.5 \text{ Hz, 12H, 4CH}_3\text{) ppm}$ .

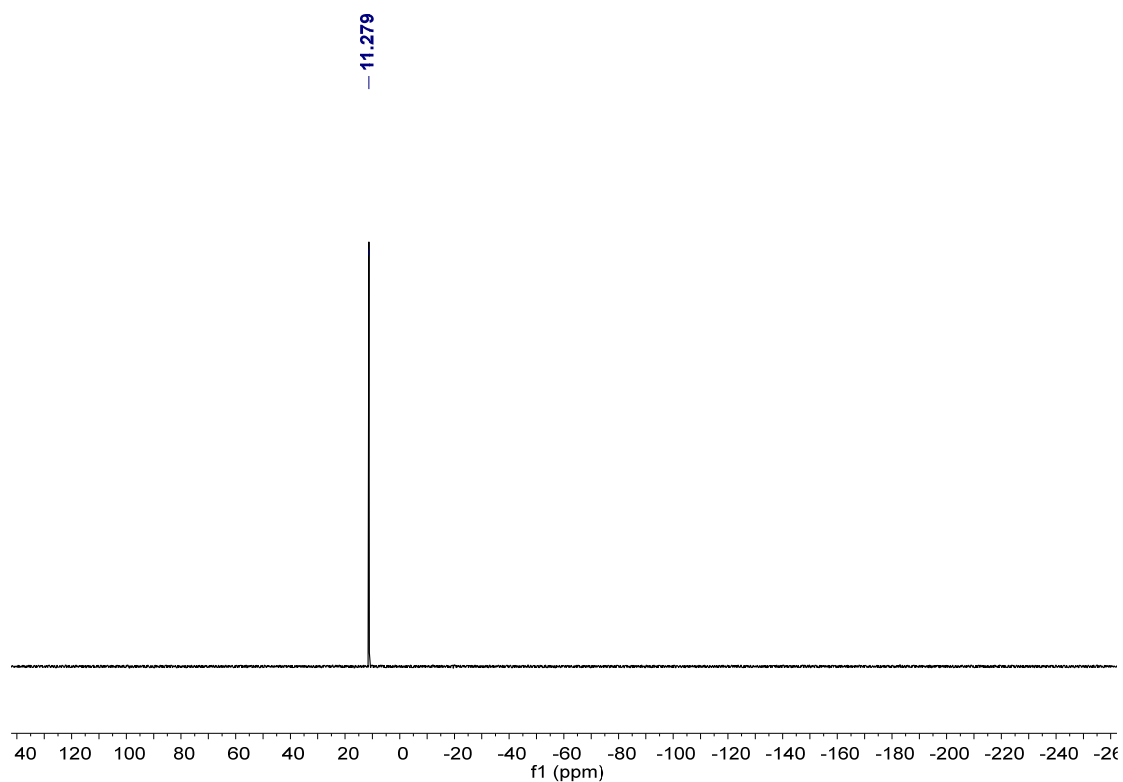

Figure S3.  $^{31}\text{P}$  NMR (202 MHz,  $\text{CDCl}_3$ , 25 °C) spectrum of **1**.

Assignments:  $\delta = 11.28$  (s) ppm

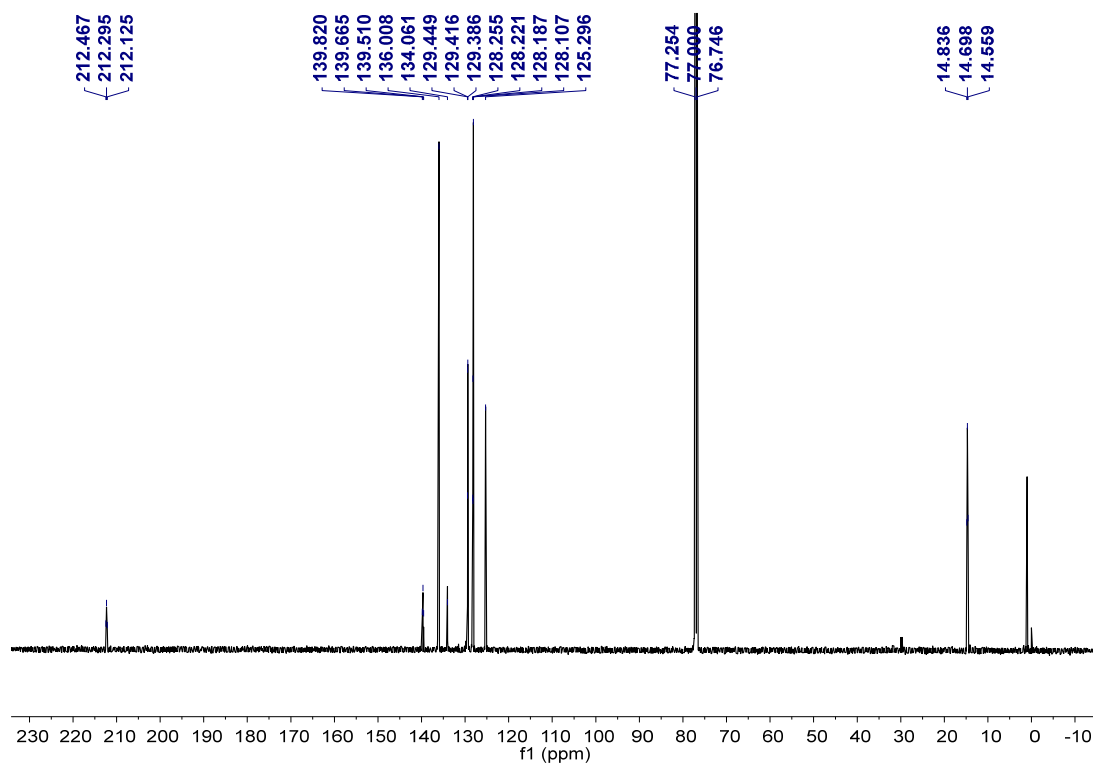

Figure S4.  $^{13}\text{C}$  NMR (126 MHz,  $\text{CDCl}_3$ , 25 °C) spectrum of **1**.

Assignments:  $\delta = 212.3$  (t,  $^2J_{\text{P-C}} = 21.4$ ,  $\text{Fe}(\text{CO})_2$ ), 139.8-125.3 ( $\text{C}_6\text{H}_5$ ), 14.7 (t,  $J_{\text{P-C}} = 17.4$  Hz,  $\text{PCH}_3$ ) ppm

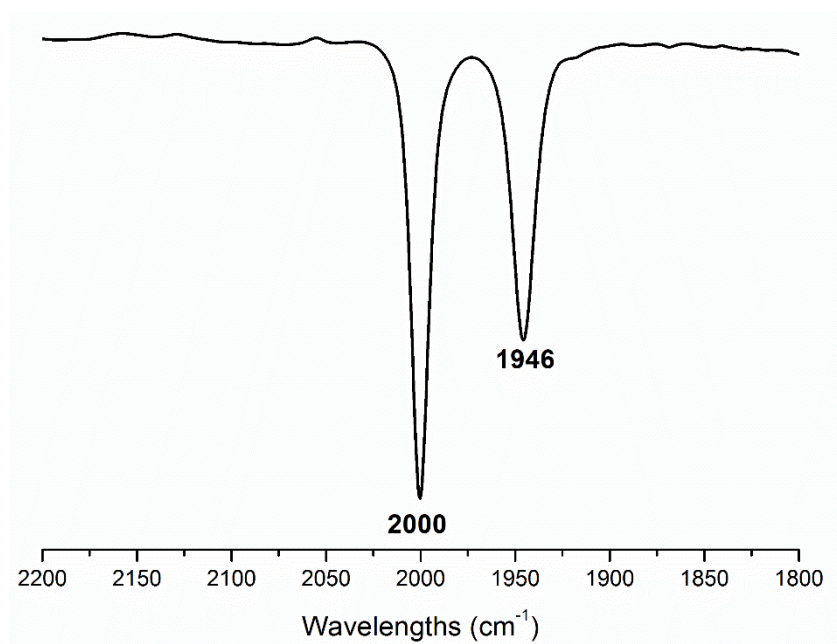

Figure S5. FT-IR ( $\text{CH}_2\text{Cl}_2$ ,  $25^\circ\text{C}$ ) spectrum of **2**. Assignments:  $\nu_{\text{CO}} = 2000, 1946 \text{ cm}^{-1}$ .

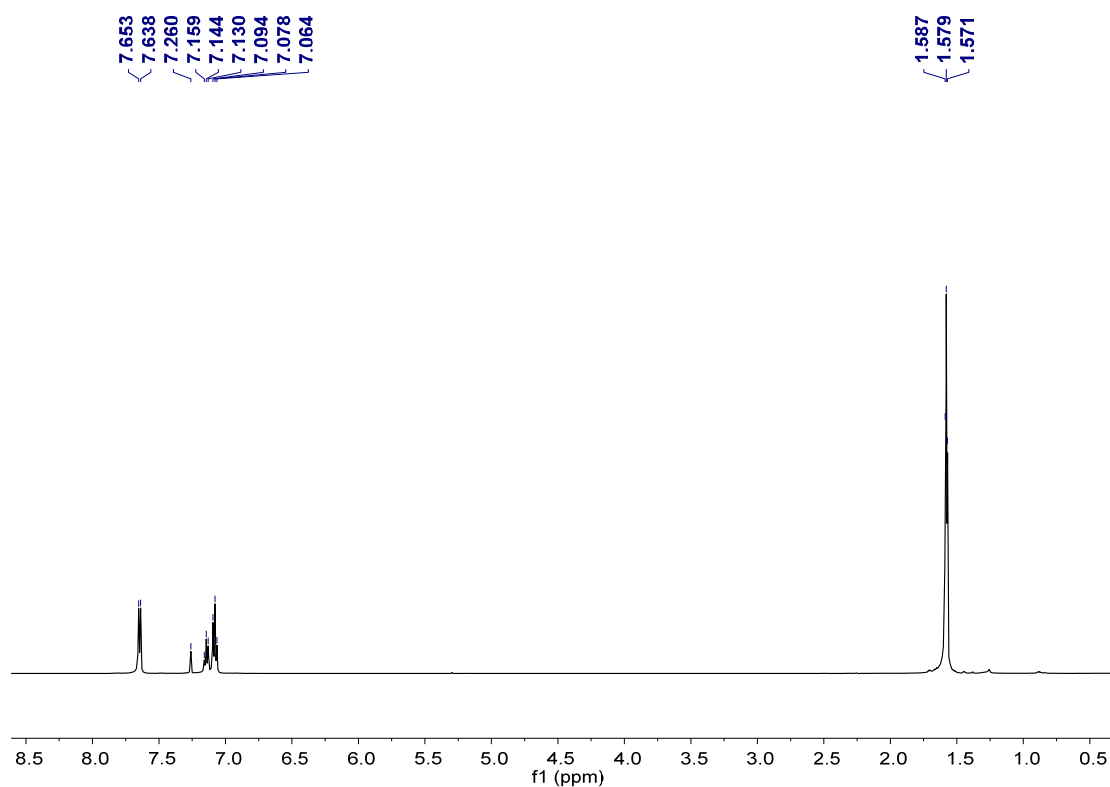

Figure S6.  $^1\text{H}$  NMR (500 MHz,  $\text{CDCl}_3$ ,  $25^\circ\text{C}$ ) spectrum of **2**. Assignments:  $\delta = 7.65, 7.14, 7.08$  (d, t, t,  $^3J_{\text{H-H}} = 7.5 \text{ Hz}$ , 10H,  $2\text{C}_6\text{H}_5$ ), 1.58 (t,  $^2J_{\text{P-H}} = 4\text{ Hz}$ , 18H,  $6\text{CH}_3$ ) ppm.

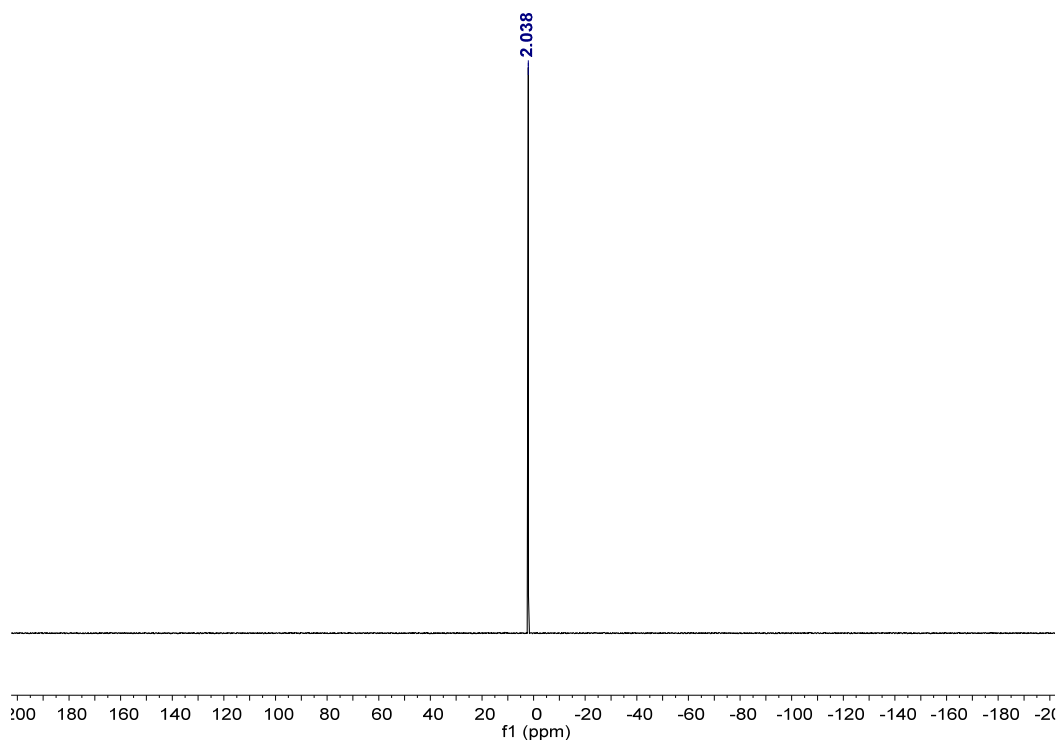

Figure S7. <sup>31</sup>P NMR (202 MHz, CDCl<sub>3</sub>, 25 °C) spectrum of **2**.

Assignments:  $\delta = 2.04$  (s) ppm

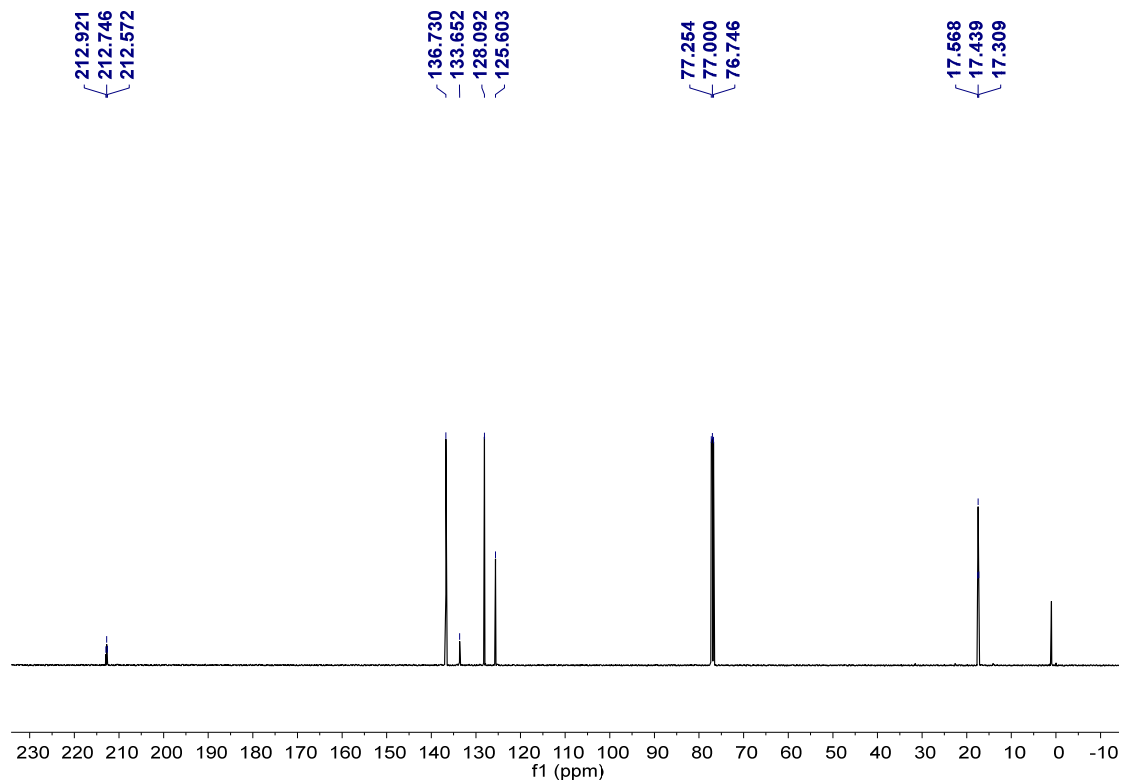

Figure S8. <sup>13</sup>C NMR (126 MHz, CDCl<sub>3</sub>, 25 °C) spectrum of **2**. Assignments:  $\delta = 212.7$  (t, <sup>2</sup>J<sub>P-C</sub> = 22.0, Fe(CO)<sub>2</sub>), 136.7, 133.6, 128.1, 125.6 (C<sub>6</sub>H<sub>5</sub>), 17.4 (t, J<sub>P-C</sub> = 16.2 Hz, PCH<sub>3</sub>) ppm.

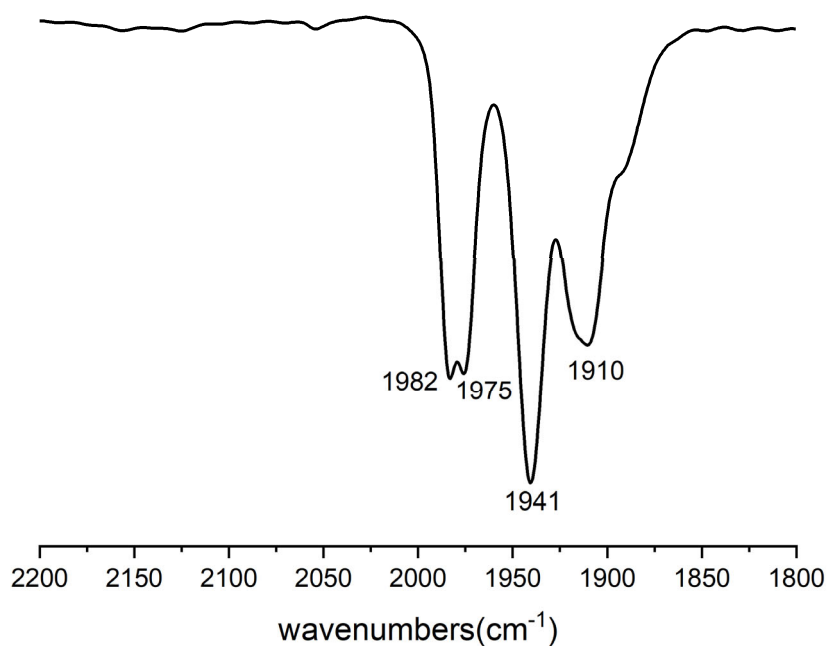

Figure S9. FT-IR (CH<sub>2</sub>Cl<sub>2</sub>, 25°C) spectrum of **3-anti**.

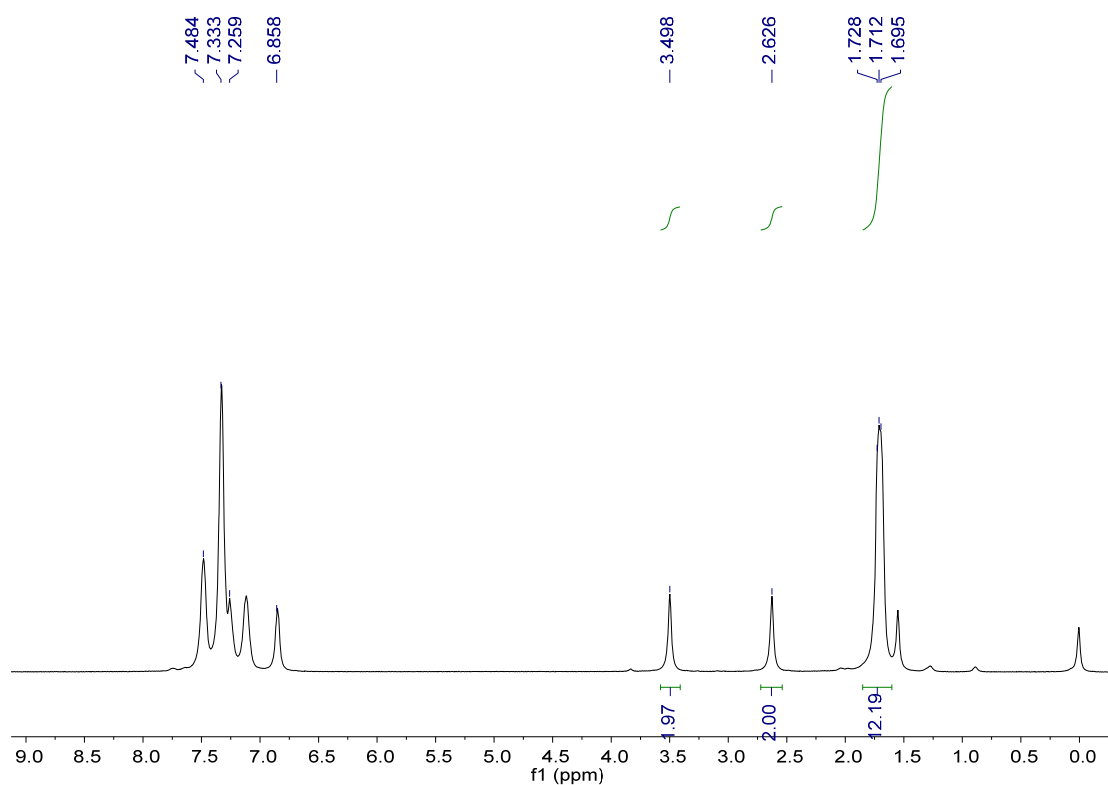

Figure S10. <sup>1</sup>H NMR (500 MHz, CDCl<sub>3</sub>, 25 °C) spectrum of **3-anti**.

*Assignments:* δ = 7.48-6.86 (m, 20H, 4C<sub>6</sub>H<sub>5</sub>), 3.50, 2.63 (2s, 4H, 2PhCH<sub>2</sub>), 1.71 (t, *J* = 8.0 Hz, 12H, 4PCH<sub>3</sub>) ppm.

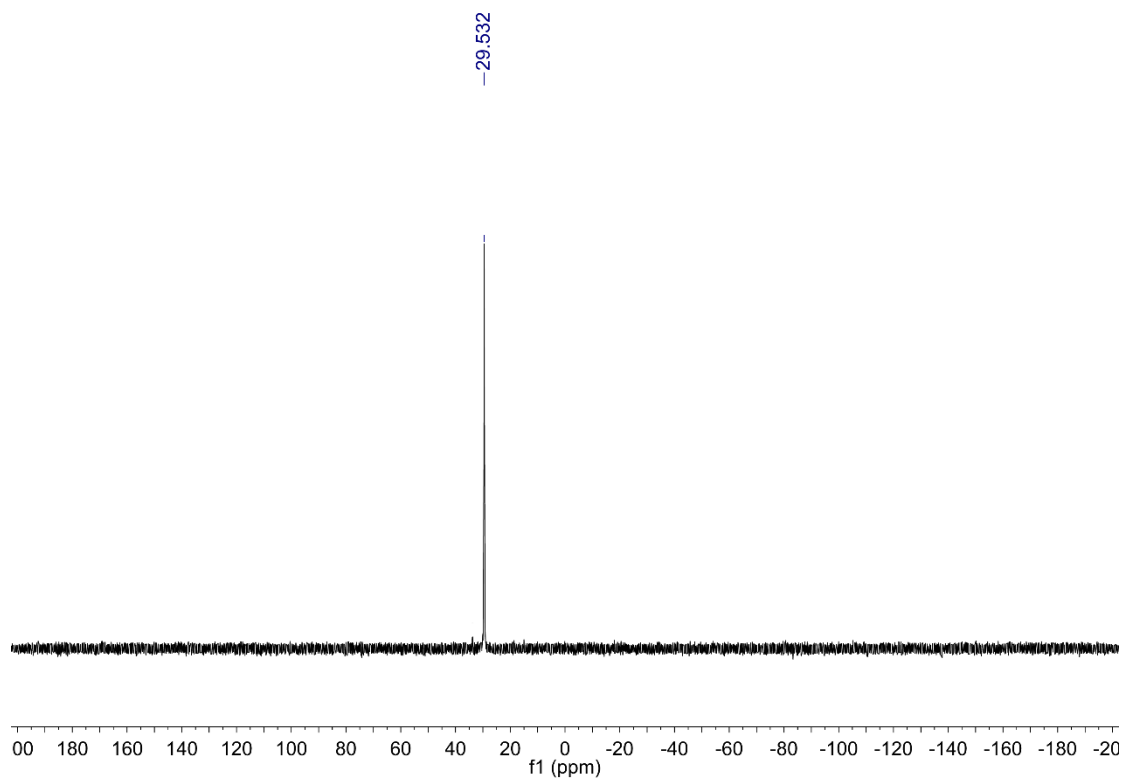

Figure S11.  $^{31}\text{P}$  NMR (202 MHz,  $\text{CDCl}_3$ , 25 °C) spectrum of **3-anti**.

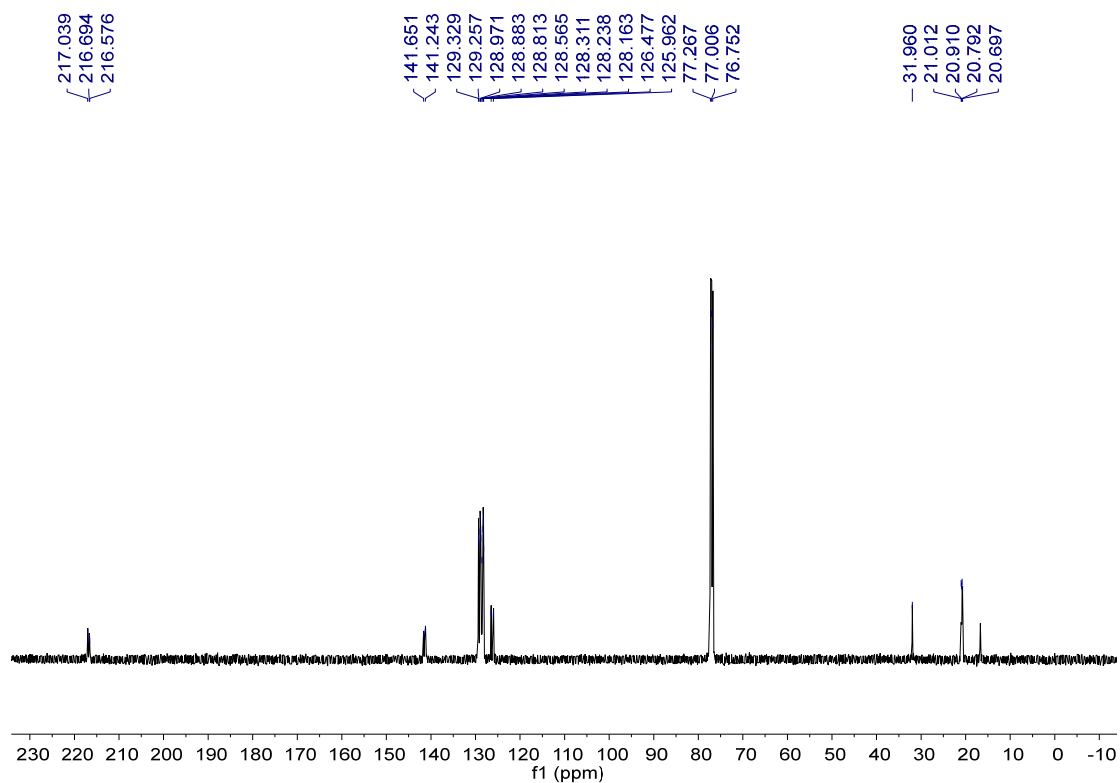

Figure S12.  $^{13}\text{C}$  NMR (126 MHz,  $\text{CDCl}_3$ , 25 °C) spectrum of **3-anti**.

*Assignments:*  $\delta = 216.7$ , (t,  $^2J_{\text{P-C}} = 3.2$  Hz,  $\text{PFe}(\text{CO})_2$ ), 126.0-141.6 (m,  $\text{C}_6\text{H}_5$ ), 32.0 (s,  $\text{PhCH}_2$ ), 20.9 (d,  $J_{\text{P-C}} = 12.8$  Hz,  $\text{PCH}_3$ ), 20.7 (d,  $J_{\text{P-C}} = 11.9$  Hz,  $\text{PCH}_3$ ).

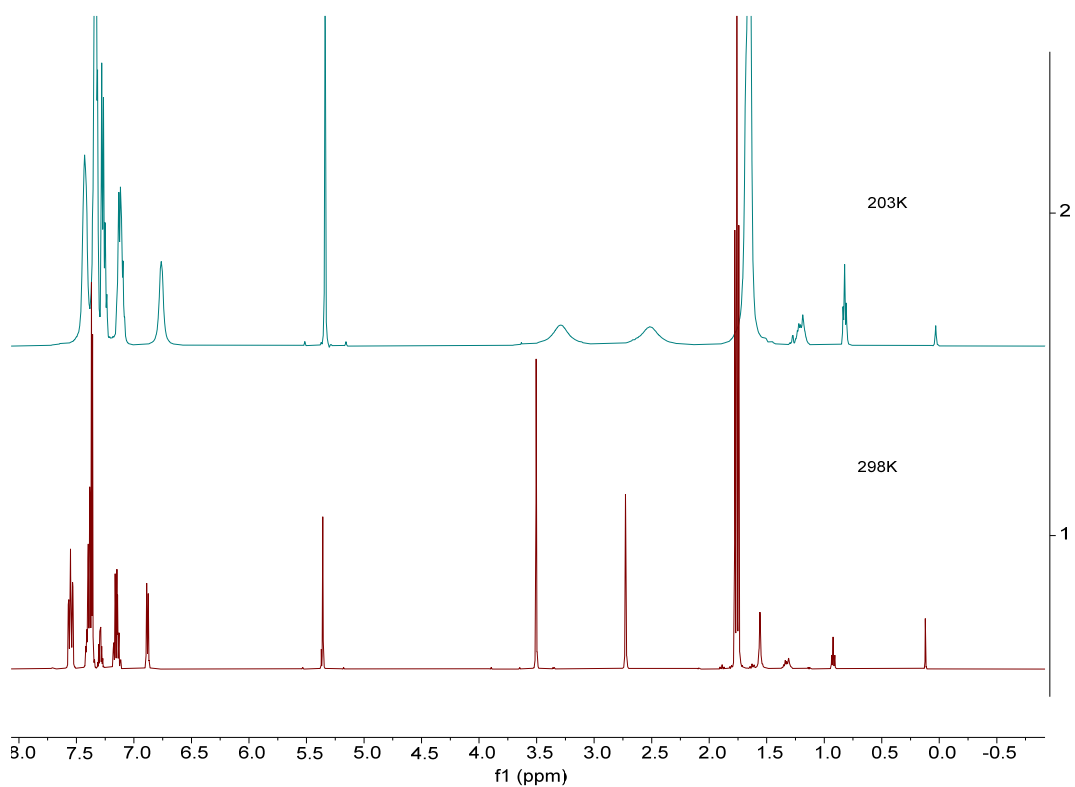

Figure S13. VT-<sup>1</sup>H NMR spectrum of **3-anti** in CD<sub>2</sub>Cl<sub>2</sub>.

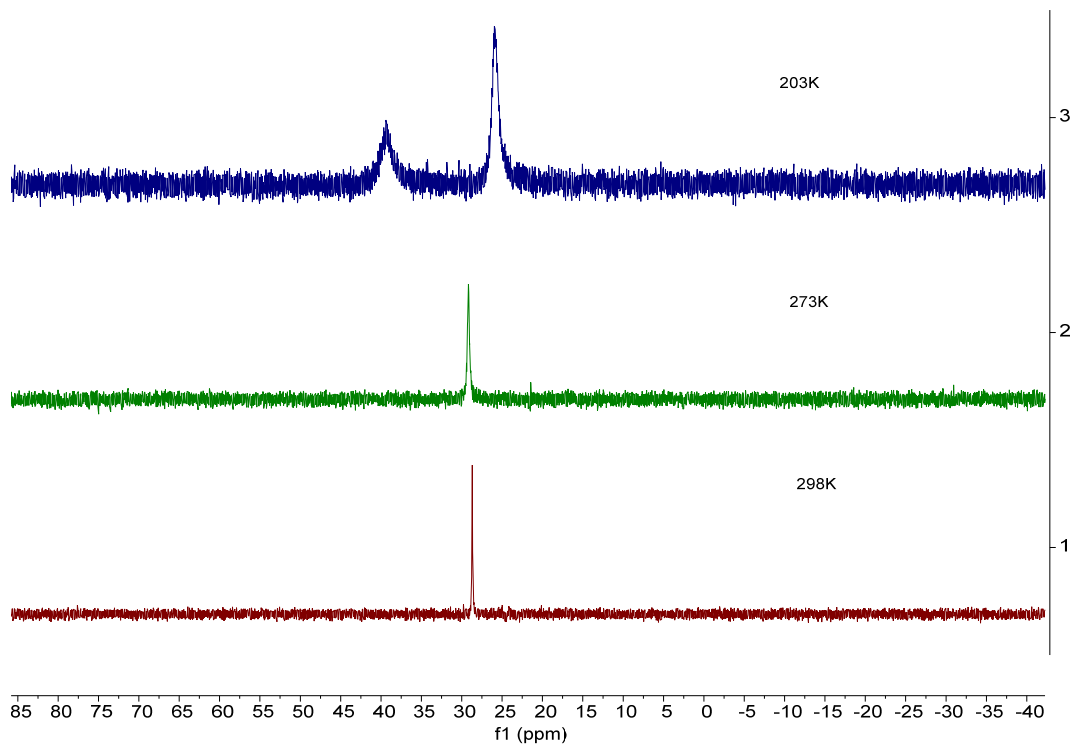

Figure S14. VT-<sup>31</sup>P NMR spectra of **3-anti** in CD<sub>2</sub>Cl<sub>2</sub>.



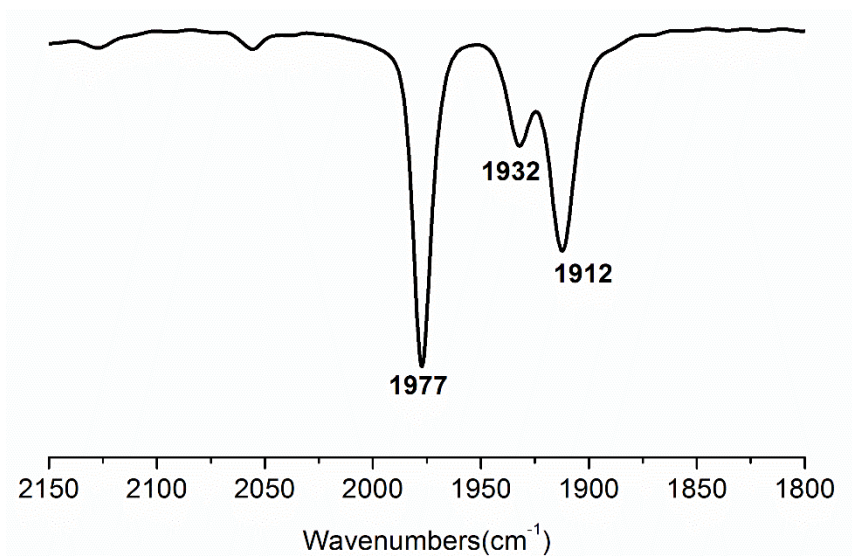

Figure S15. FT-IR ( $\text{CH}_2\text{Cl}_2$ ,  $25^\circ\text{C}$ ) spectrum of **3-syn**.

Assignments:  $\nu_{\text{CO}} = 1977, 1932, 1912 \text{ cm}^{-1}$ .

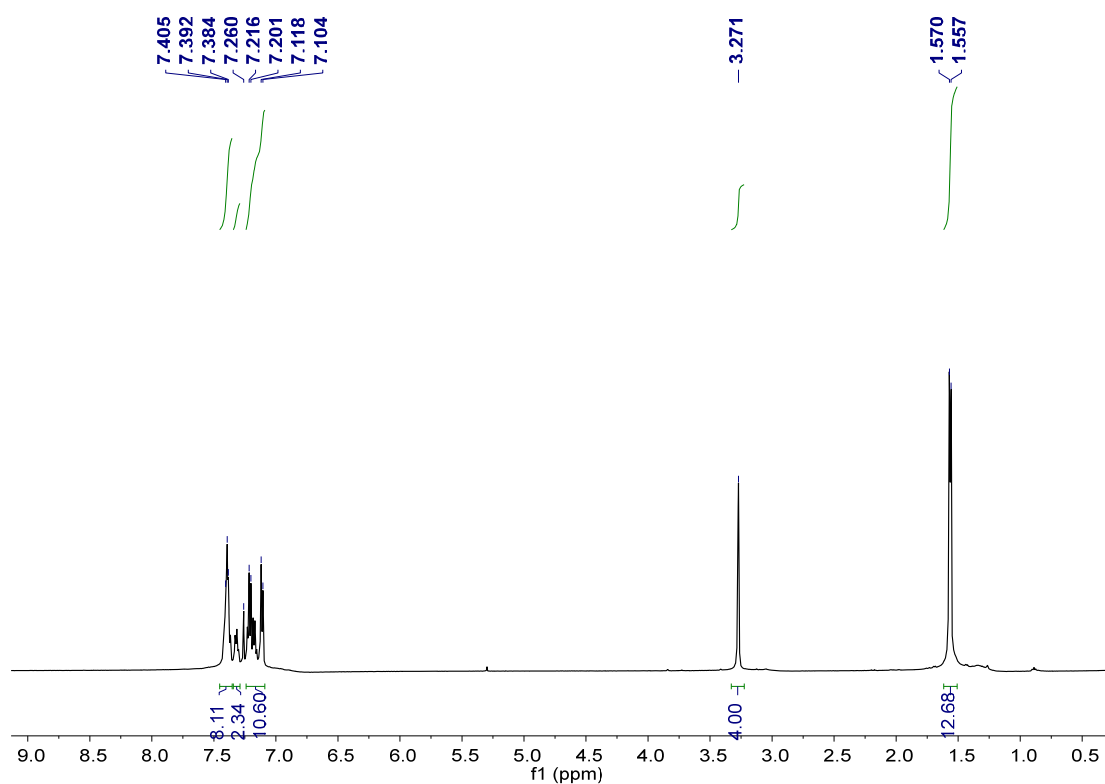

Figure S16.  $^1\text{H}$  NMR (500 MHz,  $\text{CDCl}_3$ ,  $25^\circ\text{C}$ ) spectrum of **3-syn**.

Assignments:  $\delta = 7.41\text{-}7.10$  (m, 20H,  $4\text{C}_6\text{H}_5$ ), 3.27 (s, 4H,  $2\text{PhCH}_2$ ), 1.56 (d,  $J = 6.5$  Hz, 12H,  $4\text{PCH}_3$ ) ppm.

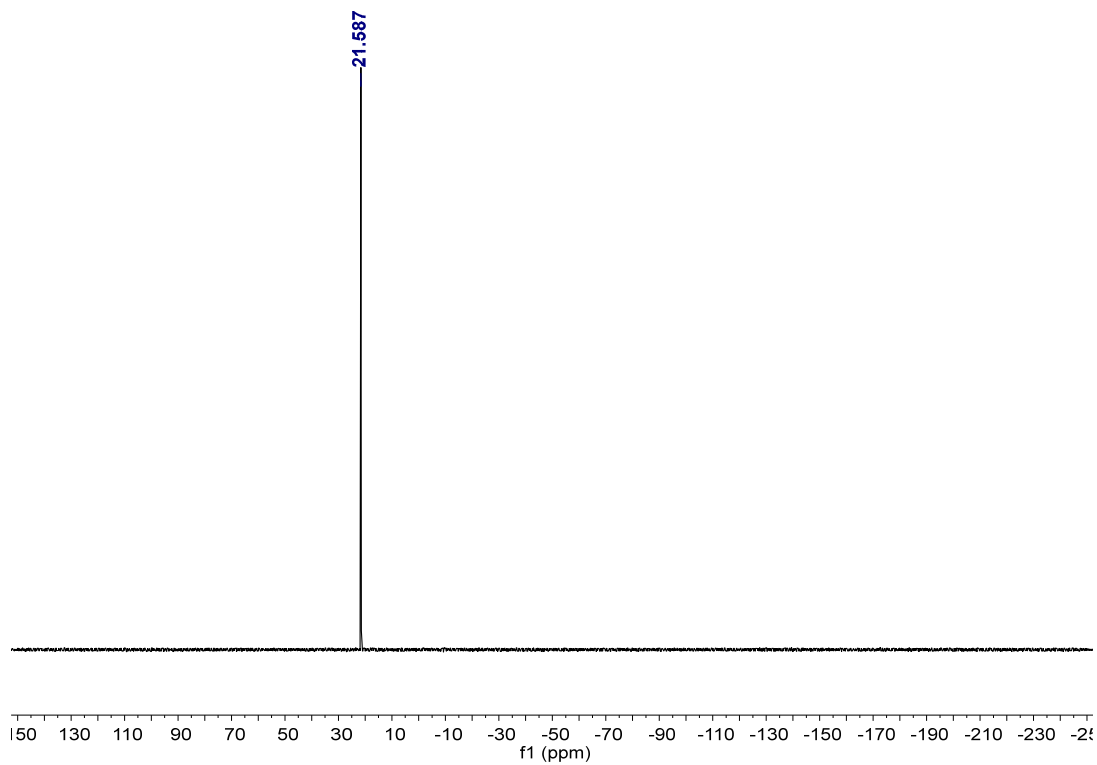

Figure S17. <sup>31</sup>P NMR (202 MHz, CDCl<sub>3</sub>, 25 °C) spectrum of **3-syn**.

Assignments:  $\delta = 21.58$  (s) ppm

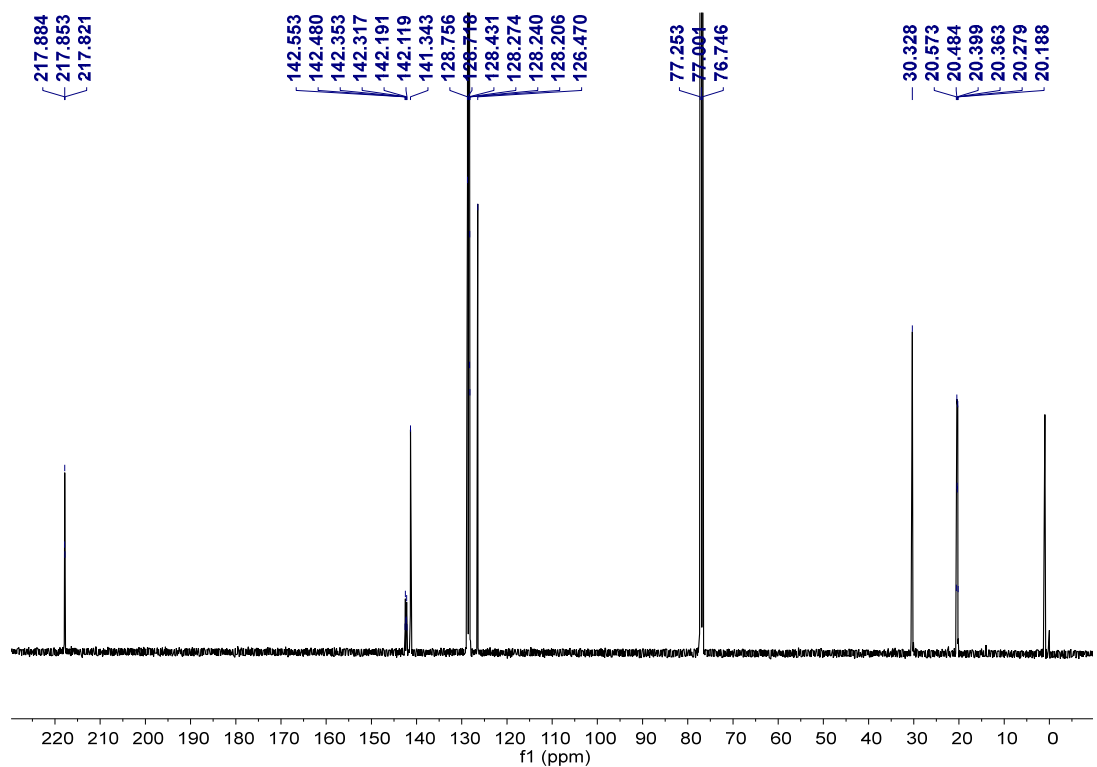

Figure S18. <sup>13</sup>C NMR (126 MHz, CDCl<sub>3</sub>, 25 °C) spectrum of **3-syn**.

Assignments:  $\delta = 217.8$ , (t,  $^2J_{P-C} = 3.2$  Hz, PFe(CO)<sub>2</sub>), 126.5-142.5 (m, C<sub>6</sub>H<sub>5</sub>), 30.3 (s, PhCH<sub>2</sub>), 20.5, 20.3 (2t,  $J_{P-C} = 11.2$  Hz, PCH<sub>3</sub>).

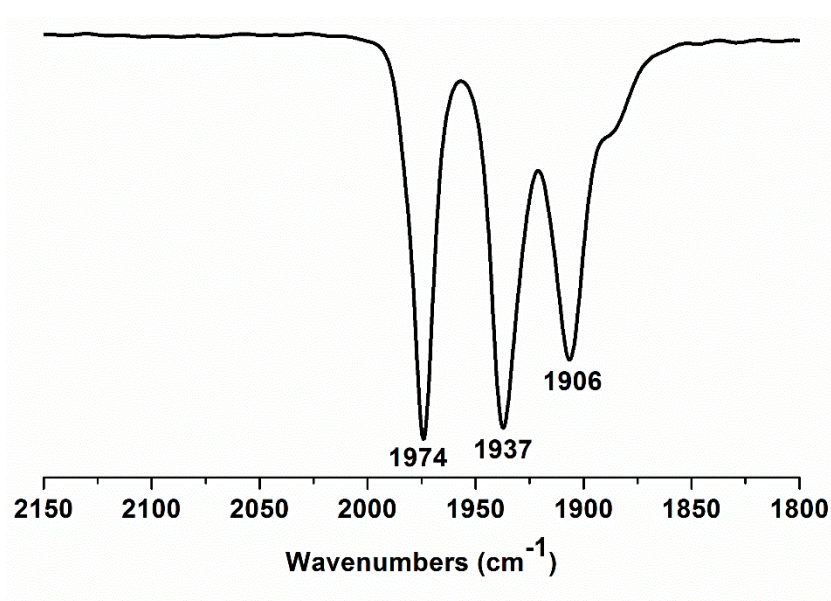

Figure S19. FT-IR (in CH<sub>2</sub>Cl<sub>2</sub>, 25°C) spectrum of **4-anti**.

Assignments:  $\nu_{CO} = 1974, 1937, 1906 \text{ cm}^{-1}$ .

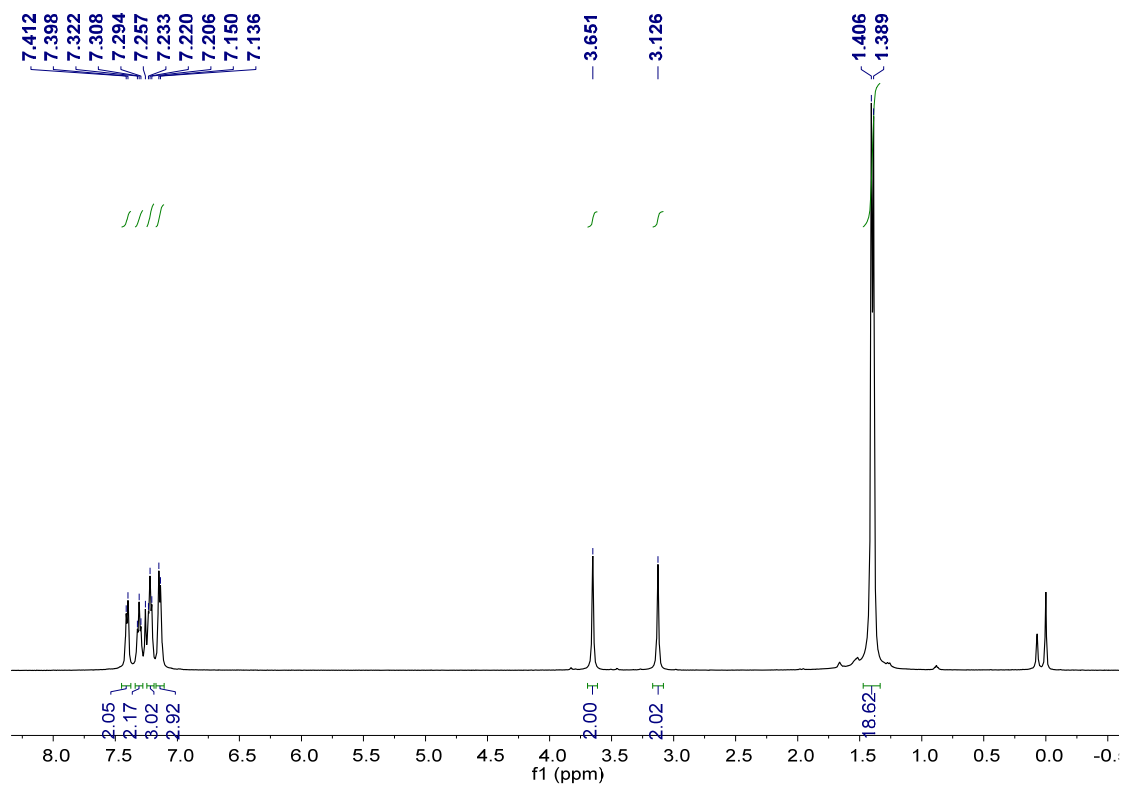

Figure S20. <sup>1</sup>H NMR (500 MHz, CDCl<sub>3</sub>, 25 °C) spectrum of **4-anti**. Assignments:  $\delta = 7.14\text{-}7.41(\text{m}, 10\text{H}, 2\text{C}_6\text{H}_5)$ , 3.65, 3.13 (2s, 4H, 2CH<sub>2</sub>), 1.39 (d, <sup>2</sup>J<sub>P-H</sub> = 8.5Hz, 18H, 6CH<sub>3</sub>) ppm.

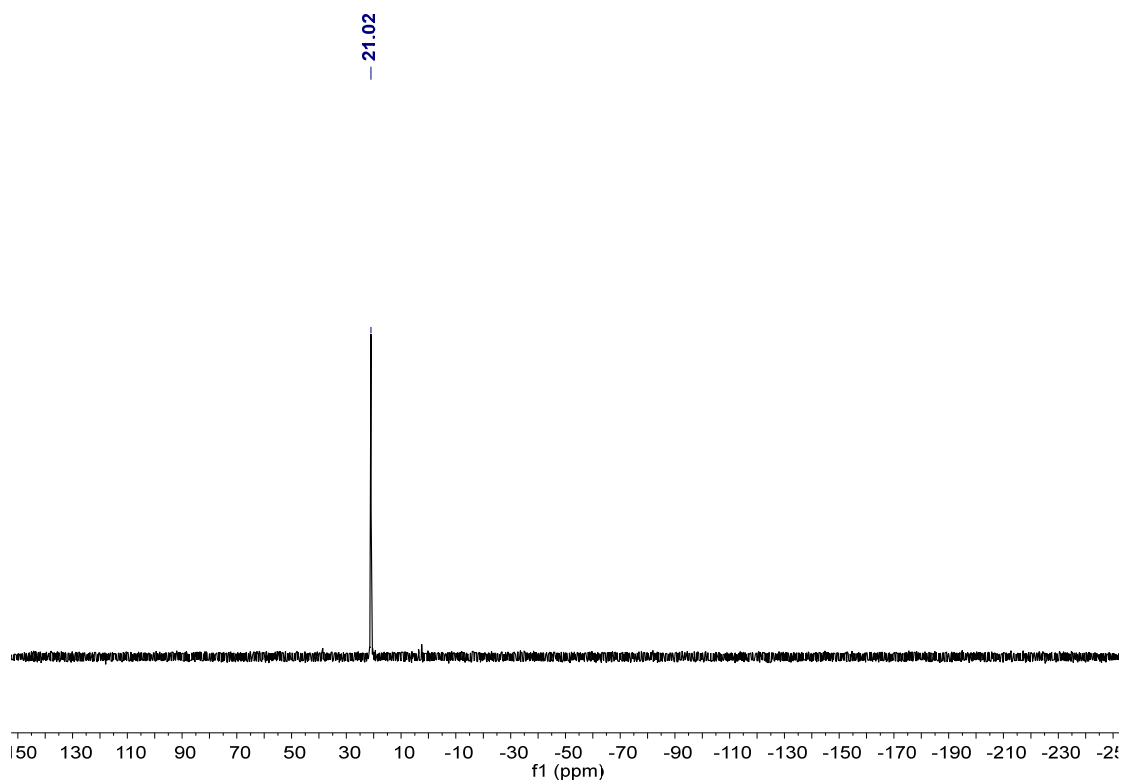

Figure S21.  $^{31}\text{P}$  NMR (202 MHz,  $\text{CDCl}_3$ , 25  $^\circ\text{C}$ ) spectrum of **4-anti**.

Assignments:  $\delta = 21.02$  (s) ppm.

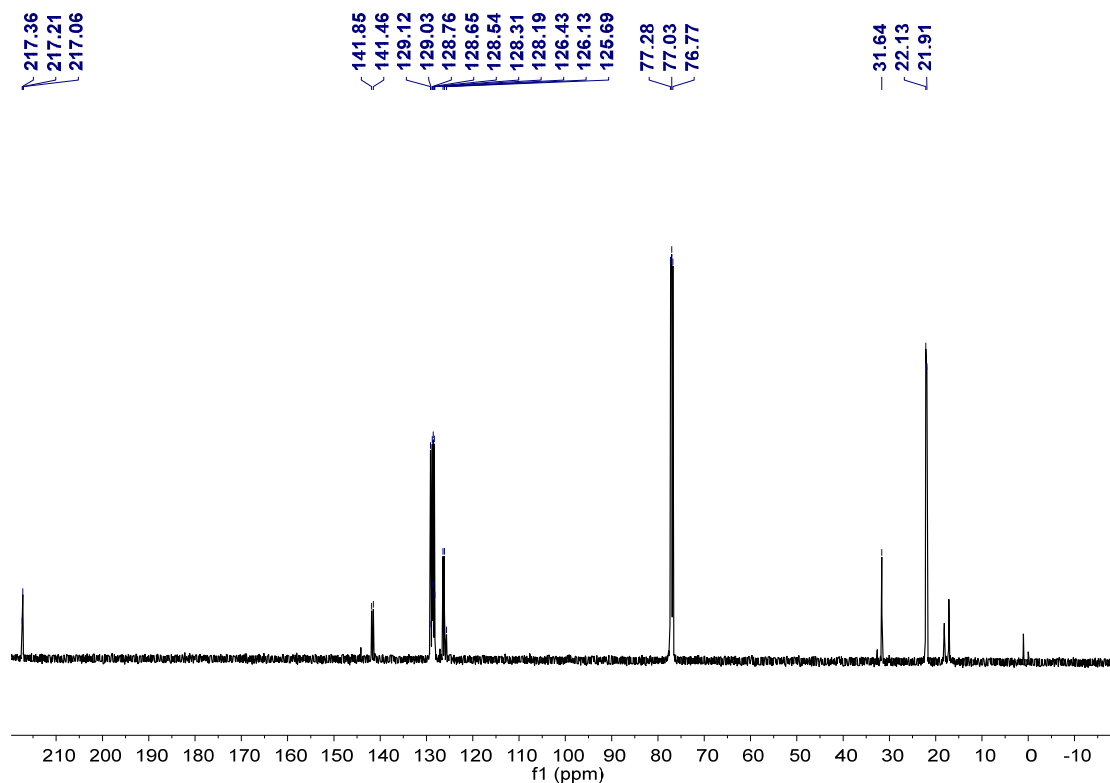

Figure S22.  $^{13}\text{C}$  NMR (126 MHz,  $\text{CDCl}_3$ , 25  $^\circ\text{C}$ ) spectrum of **4-anti**.

Assignments:  $\delta = 217.2$  (t,  $^2J_{\text{P-C}} = 18.9$ ,  $\text{Fe}(\text{CO})_2$ ), 141.8-125.7 (m,  $\text{C}_6\text{H}_5$ ), 31.6 (s,  $\text{CH}_2$ ), 22.0 (d,  $J_{\text{P-C}} = 27.7$  Hz,  $\text{PCH}_3$ ) ppm.

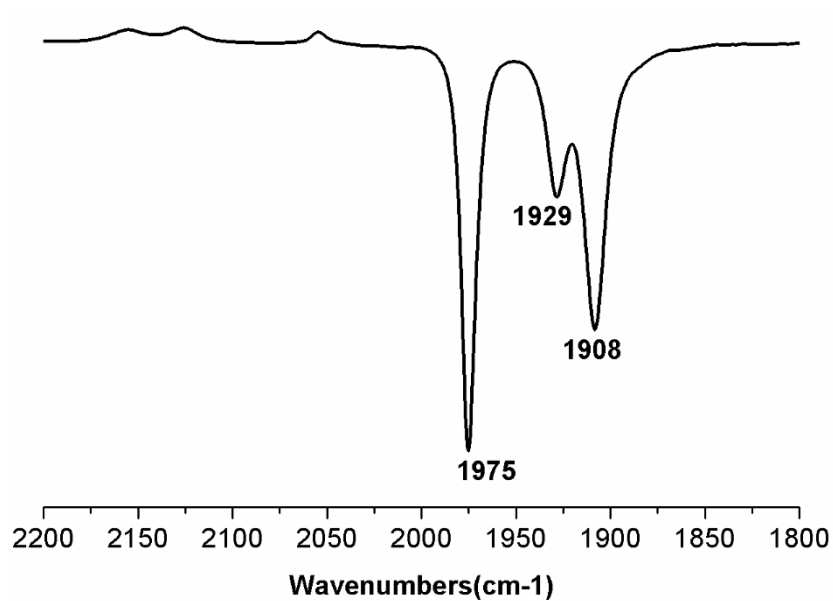

Figure S23. FT-IR (in  $\text{CH}_2\text{Cl}_2$ ,  $25^\circ\text{C}$ ) spectrum of **4-syn**.  
*Assignments:*  $\nu_{\text{CO}} = 1975, 1929, 1908 \text{ cm}^{-1}$ .

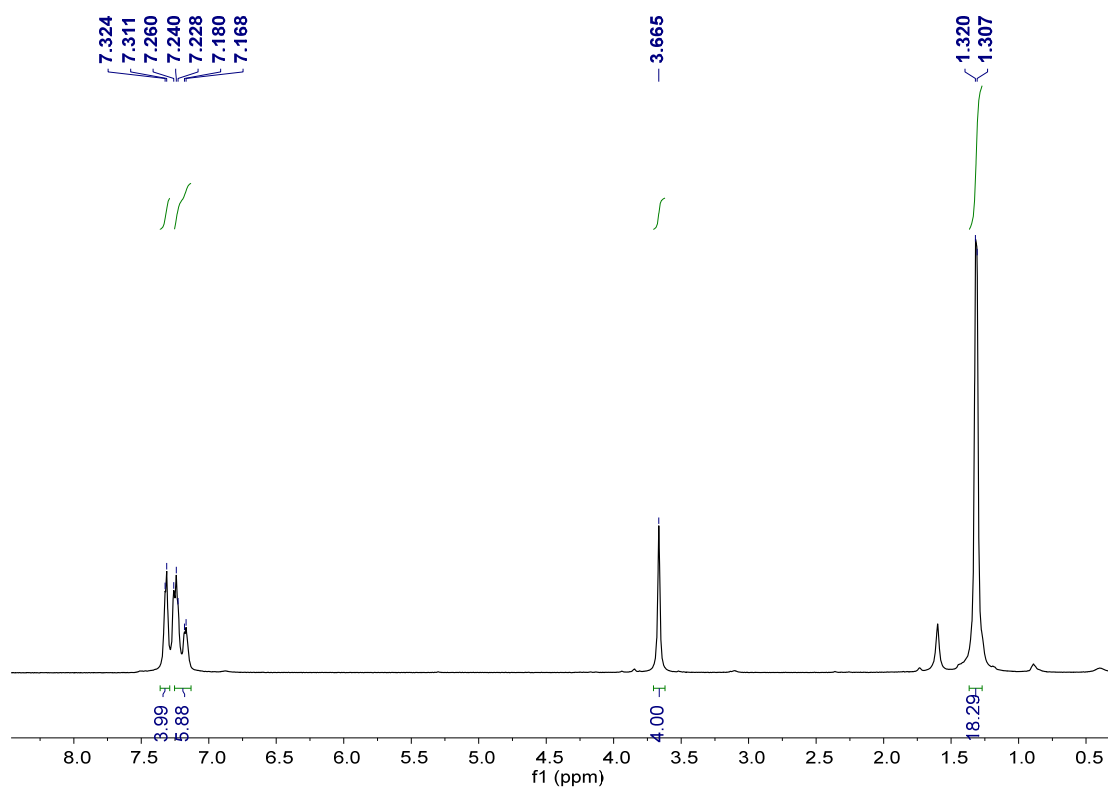

Figure S24.  $^1\text{H}$  NMR (500 MHz,  $\text{CDCl}_3$ ,  $25^\circ\text{C}$ ) spectrum of **4-syn**.  
*Assignments:*  $\delta = 7.17\text{-}7.32$  (m, 10H,  $2\text{C}_6\text{H}_5$ ), 3.67 (s, 4H,  $2\text{PhCH}_2$ ), 1.31 (d,  $J = 4.5$  Hz, 18H,  $6\text{CH}_3$ ) ppm

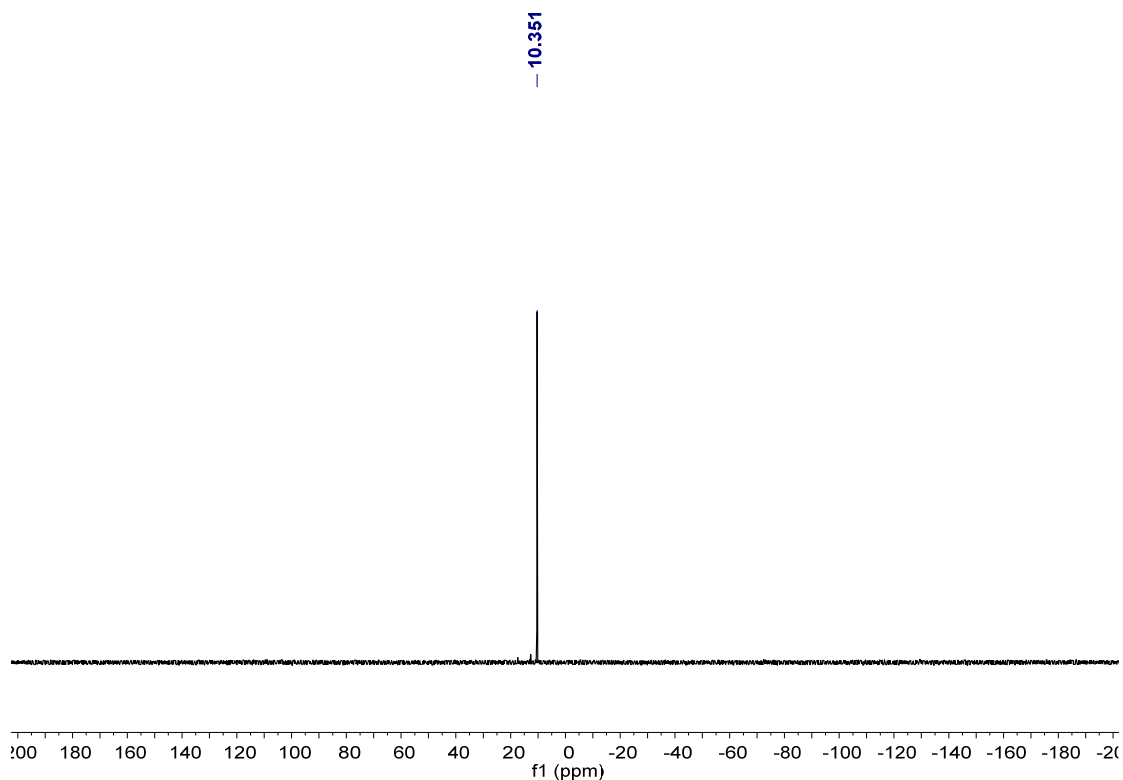

Figure S25. <sup>31</sup>P NMR (202 MHz, CDCl<sub>3</sub>, 25 °C) spectrum of **4-syn**. Assignments: δ = 10.35 (s) ppm

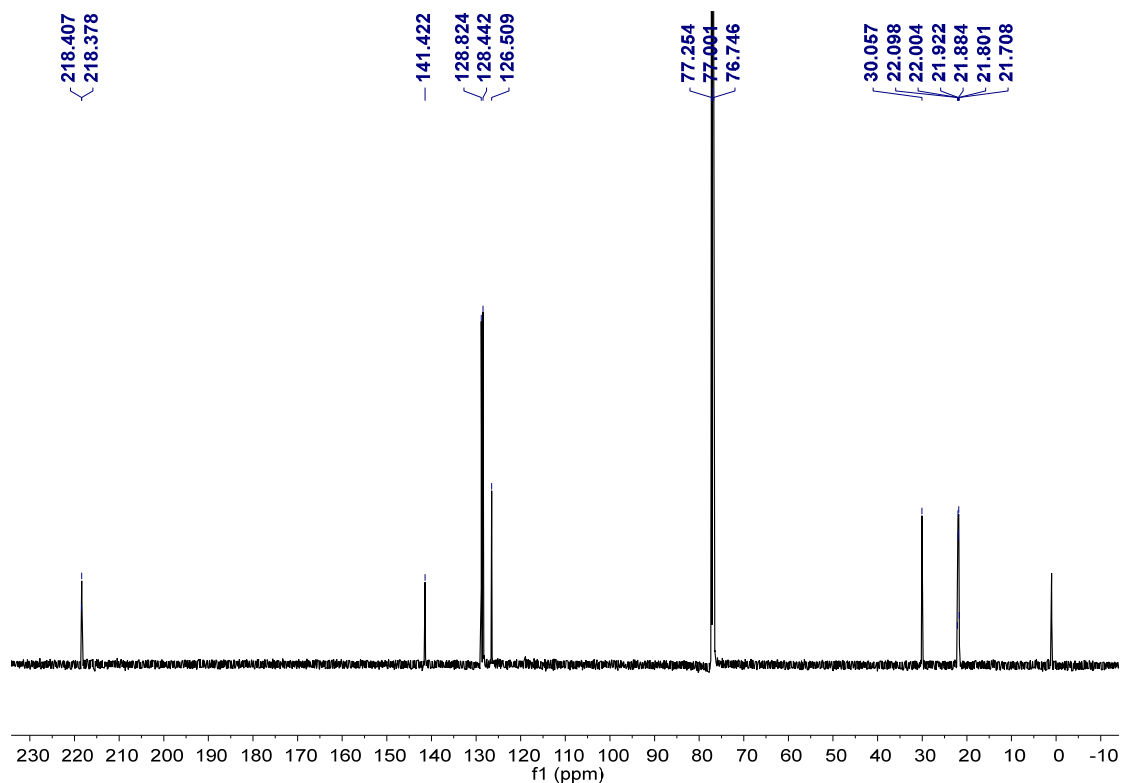

Figure S26. <sup>13</sup>C NMR (126 MHz, CDCl<sub>3</sub>, 25 °C) spectrum of **4-syn**.

Assignments: δ= 218.4 (t, <sup>2</sup>J<sub>P-C</sub> = 3.7, Fe(CO)<sub>2</sub>), 141.4, 128.8, 128.4, 126.5 (s, C<sub>6</sub>H<sub>5</sub>), 30.1 (s, CH<sub>2</sub>), 22.1-21.7 (m, PCH<sub>3</sub>).

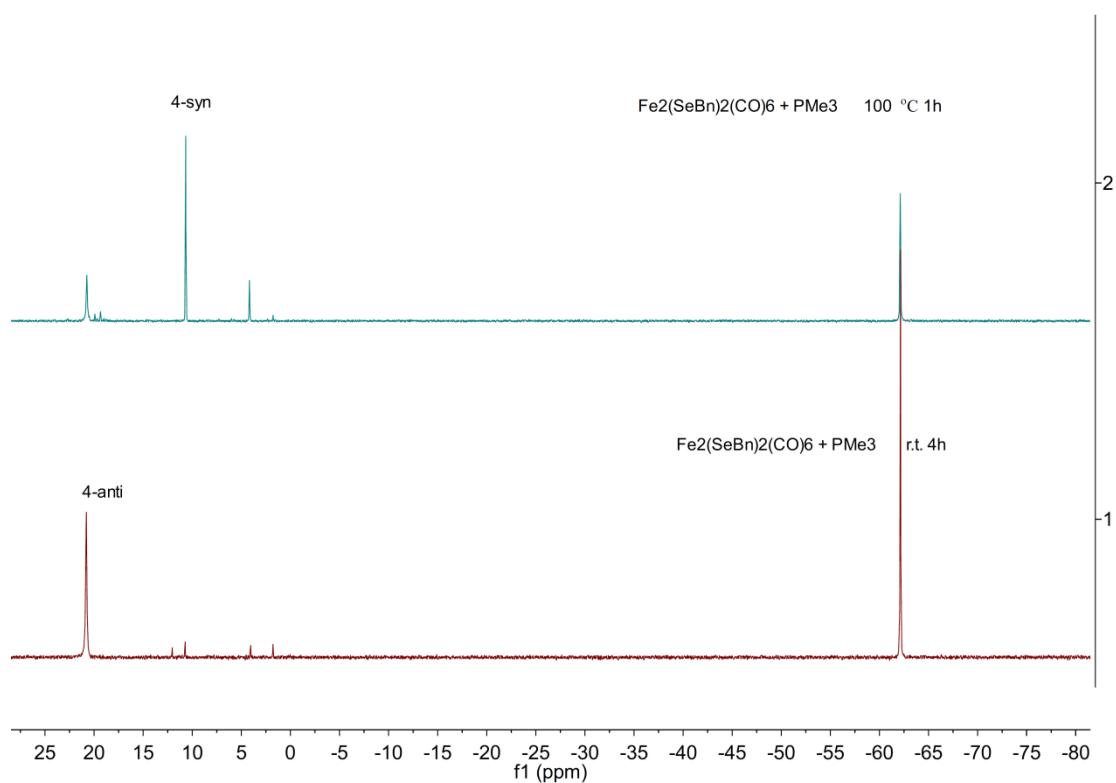

FigureS27  $^{31}\text{P}$  NMR spectra in the reaction of 5 equivalents of  $\text{PMe}_3$  with  $\text{Fe}(\mu\text{-SeCH}_2\text{Ph})_2(\text{CO})_6$  in toluene (stirred at room temperature for 4h (1), then heated to  $100^\circ\text{C}$  for 1h (2)).

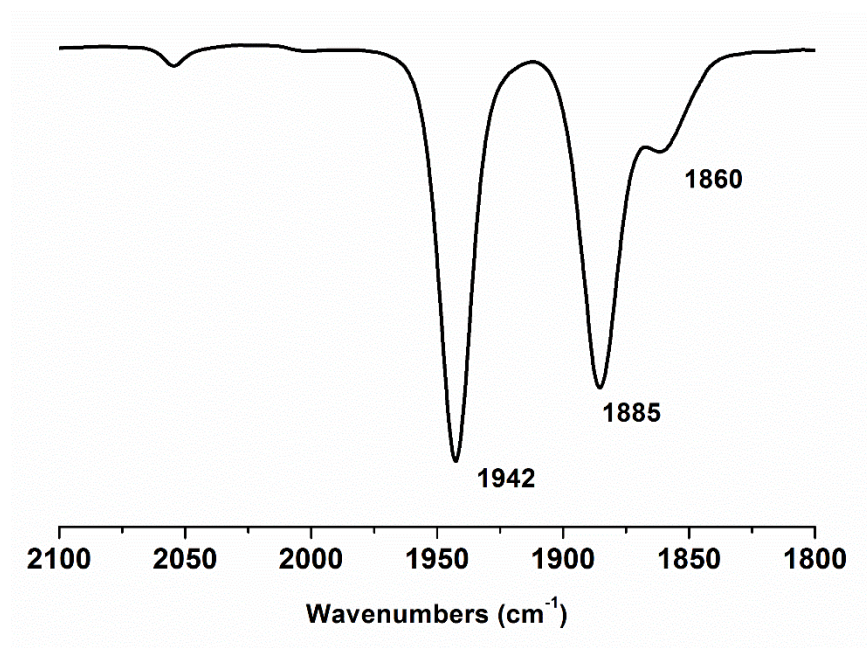

Figure S28. FT-IR (in  $\text{CH}_2\text{Cl}_2$ ,  $25^\circ\text{C}$ ) spectrum of **5**.  
 Assignments:  $\nu_{\text{CO}} = 1942, 1885, 1860 \text{ cm}^{-1}$ .

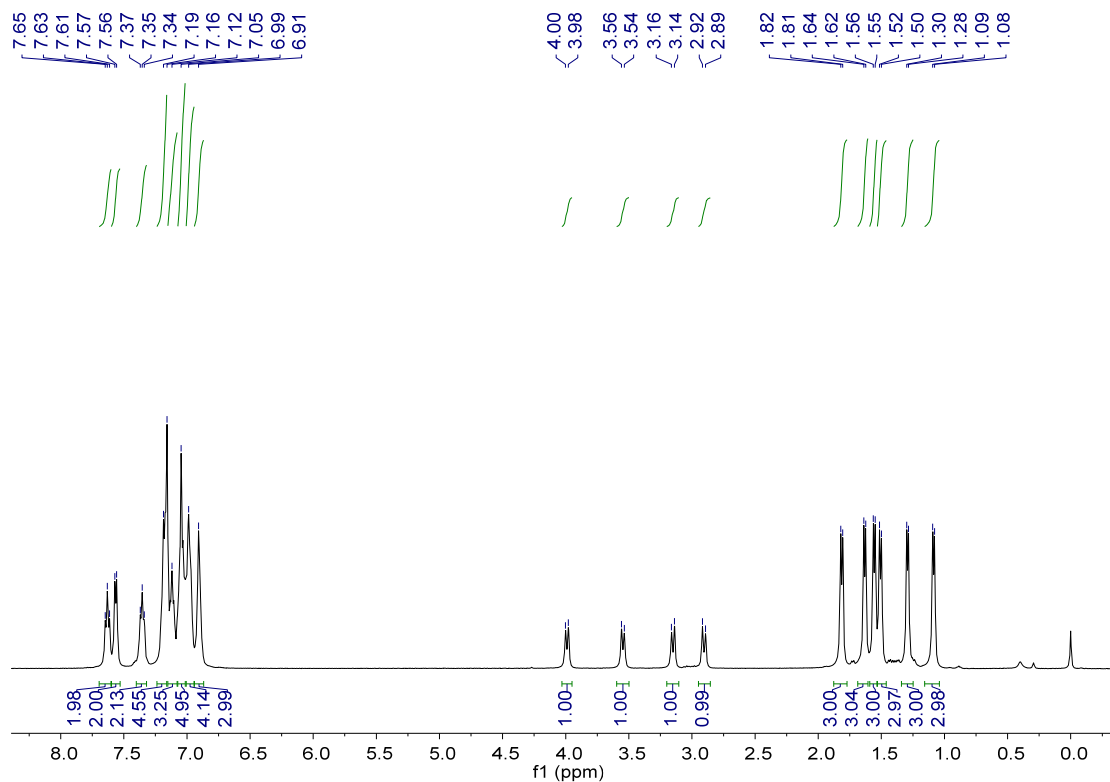

Figure S29.  $^1\text{H}$  NMR (500 MHz,  $\text{C}_6\text{D}_6$ , 25  $^\circ\text{C}$ ) spectrum of **5**. Assignments:  $\delta = 6.91\text{-}7.65$  (m, 25H,  $4\text{C}_6\text{H}_5$ ), 3.99, 3.55, 3.15, 2.90 (ABq,  $^2J_{\text{H-H}} = 11.5\text{Hz}$ , 4H,  $2\text{C}_6\text{H}_5\text{CH}_2$ ), 1.81, 1.63, 1.56, 1.51, 1.29, 1.09 (6d,  $^2J_{\text{P-H}} = 8.0\text{ Hz}$ , 18H,  $6\text{CH}_3$ ) ppm.

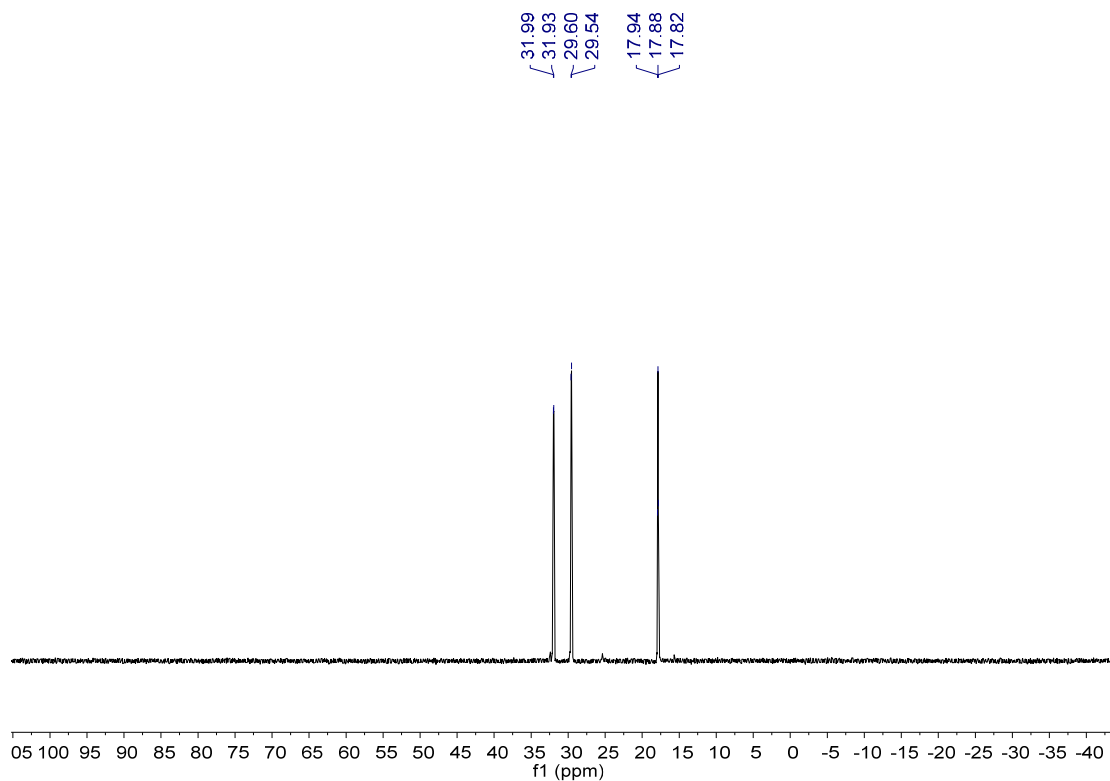

Figure S30.  $^{31}\text{P}$  NMR (202 MHz,  $\text{C}_6\text{D}_6$ , 25  $^\circ\text{C}$ ) spectrum of **5**. Assignments:  $\delta = 32.0$  (d,  $J = 11.7\text{ Hz}$ , *apical*- $\text{Fe}(\text{CO})(\text{PPhMe}_2)_2$ ), 29.6 (d,  $J = 11.6\text{ Hz}$ , *apical*- $\text{Fe}(\text{CO})_2\text{PPhMe}_2$ ), 17.9 (t,  $J = 12.1\text{ Hz}$ , *basal*- $\text{Fe}(\text{CO})(\text{PPhMe}_2)_2$ ) ppm.



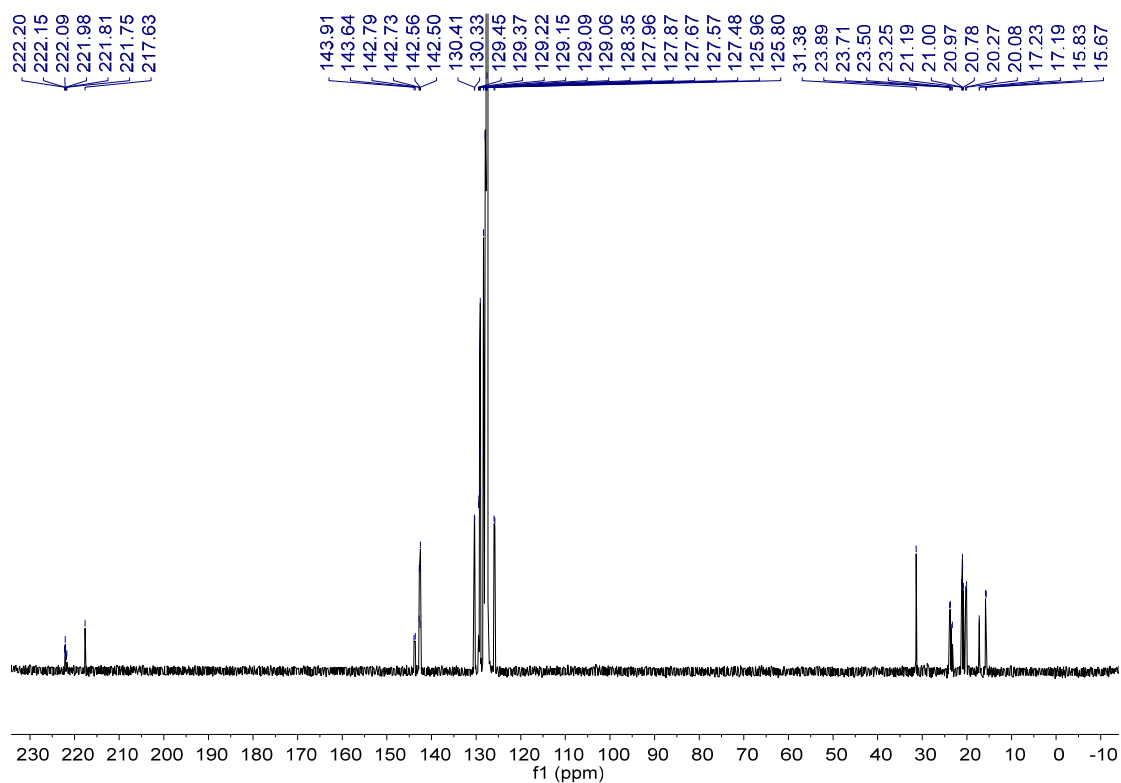

Figure S31.  $^{13}\text{C}$  NMR (126 MHz,  $\text{C}_6\text{D}_6$ , 25  $^\circ\text{C}$ ) spectrum of **5**. Assignments:  $\delta$  = 221.8-222.2 (m, Fe(CO)), 217.6 (s, Fe(CO)), 143.9-125.8 (m,  $\text{C}_6\text{H}_5$ ), 31.4(s,  $\text{CH}_2$ ), 23.9-15.7 (m,  $\text{PCH}_3$ ) ppm.

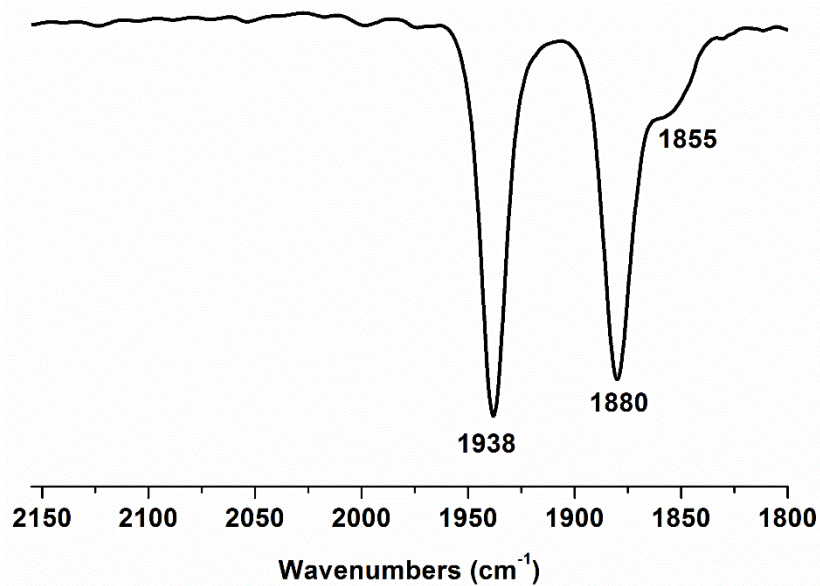

Figure S32. FT-IR (in  $\text{CH}_2\text{Cl}_2$ , 25 $^\circ\text{C}$ ) spectrum of **6**. Assignments:  $\nu_{\text{CO}}$  = 1938, 1880, 1855  $\text{cm}^{-1}$ .

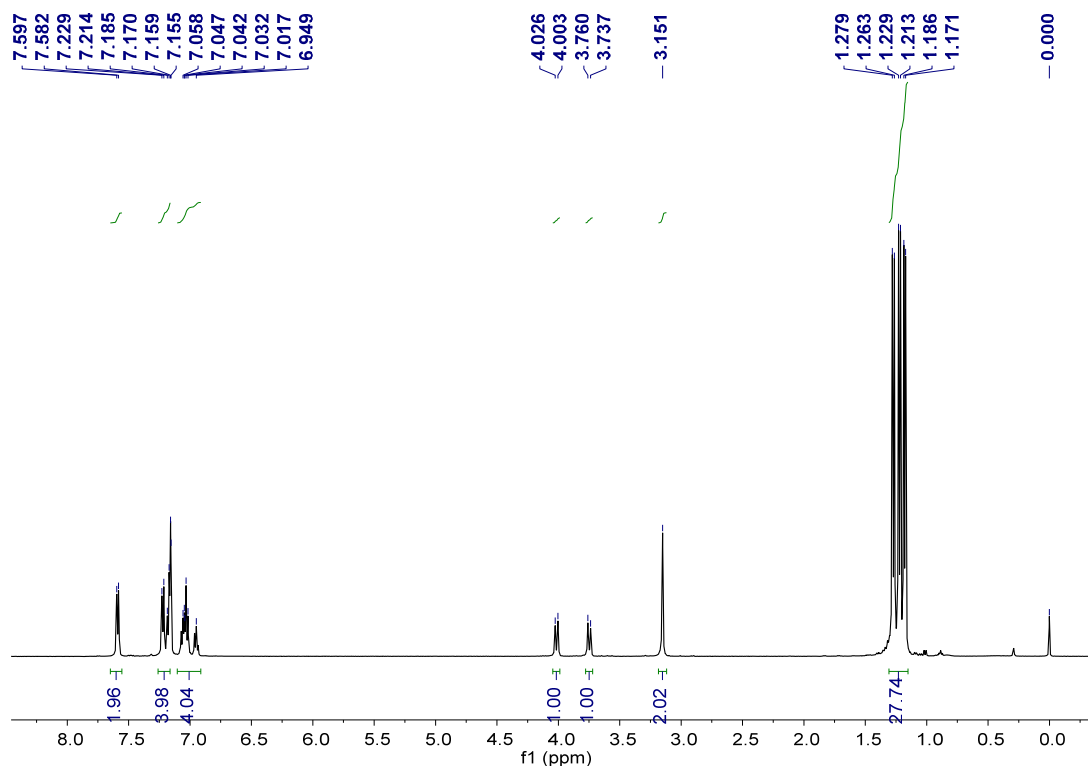

Figure S33.  $^1\text{H}$  NMR (500 MHz,  $\text{C}_6\text{D}_6$ , 25  $^\circ\text{C}$ ) spectrum of **6**. Assignments:  $\delta$  = 6.95-7.60 (m, 10H,  $2\text{C}_6\text{H}_5$ ), 4.01, 3.75 (2d,  $^2J_{\text{H-H}} = 11.5\text{Hz}$ , 2H,  $e\text{-C}_6\text{H}_5\text{CH}_2$ ), 3.15 (s, 2H,  $a\text{-C}_6\text{H}_5\text{CH}_2$ ), 1.27, 1.22, 1.18 (3d,  $^2J_{\text{P-H}} = 8.0\text{ Hz}$ , 27H, 9 $\text{CH}_3$ ) ppm.

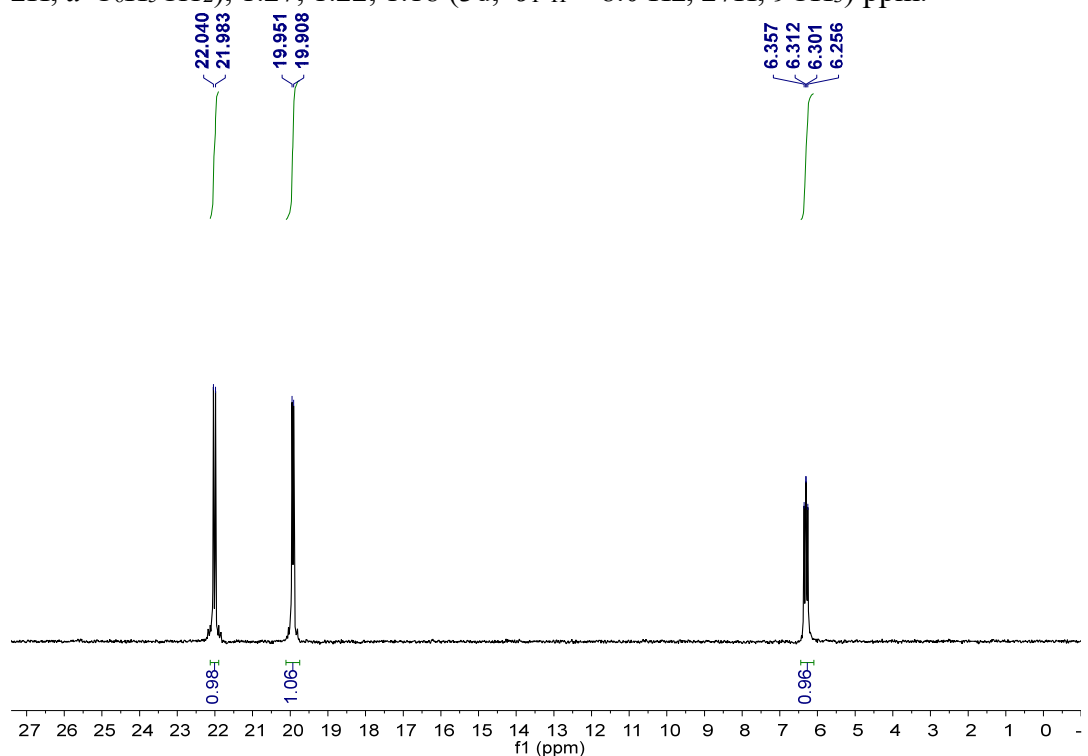

Figure S34.  $^{31}\text{P}$  NMR (202 MHz,  $\text{C}_6\text{D}_6$ , 25  $^\circ\text{C}$ ) spectrum of **6**. Assignments:  $\delta$  = 22.0 (d,  $J_{\text{P-P}} = 11.5\text{ Hz}$ , *apical*- $\text{Fe}(\text{CO})(\text{PMe}_3)_2$ ), 19.9 (d,  $J_{\text{P-P}} = 8.7\text{ Hz}$ , *apical*- $\text{Fe}(\text{CO})_2\text{PMe}_3$ ), 22.0 (dd,  $J_{\text{P-P}} = 11.3, 9.1\text{Hz}$ , *basal*- $\text{Fe}(\text{CO})(\text{PMe}_3)_2$ ).

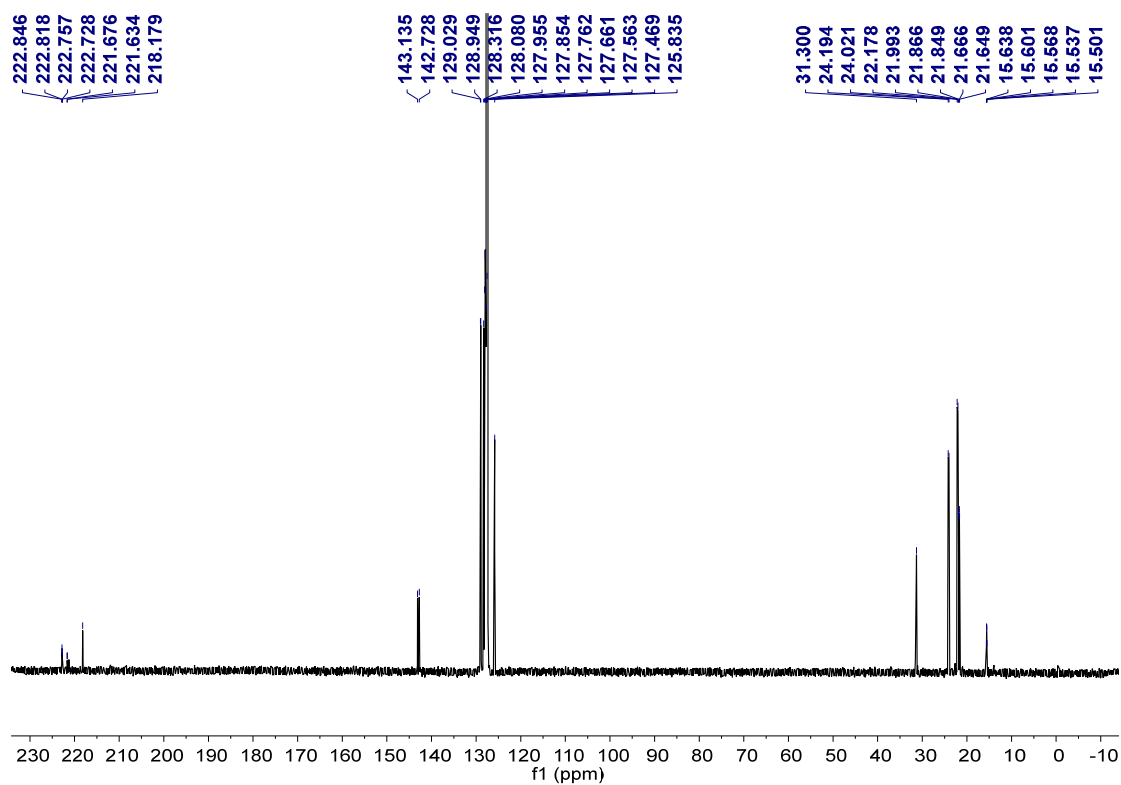

Figure S35.  $^{13}\text{C}$  NMR (126 MHz,  $\text{C}_6\text{D}_6$ , 25  $^\circ\text{C}$ ) spectrum of **6**. *Assignments:*  $\delta$  = 221.3-222.8 (m, Fe(CO)), 218.2 (s, Fe(CO)), 143.1-125.8 (m,  $\text{C}_6\text{H}_5$ ), 31.3 (s,  $\text{CH}_2$ ), 24.2-15.5 (m,  $\text{PCH}_3$ ) ppm.

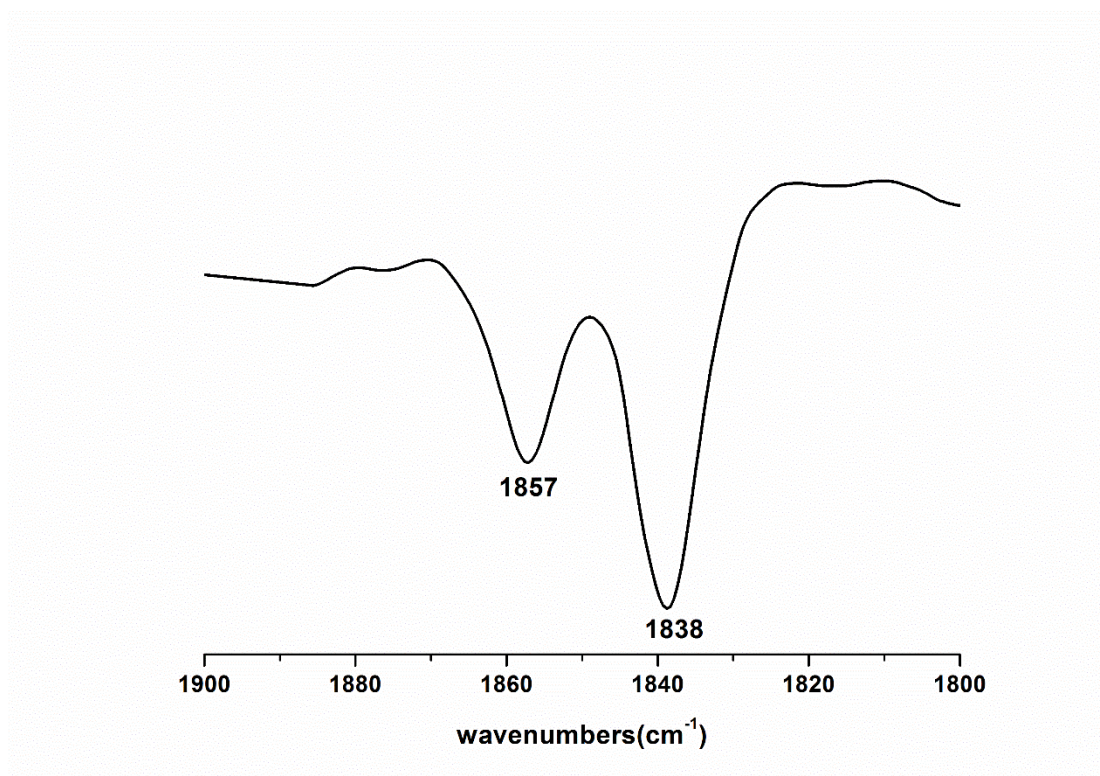

Figure S36. FT-IR (in toluene, 25°C) spectrum of **7**.  
*Assignments:*  $\nu_{CO}$  = 1938, 1880, 1855  $\text{cm}^{-1}$ .

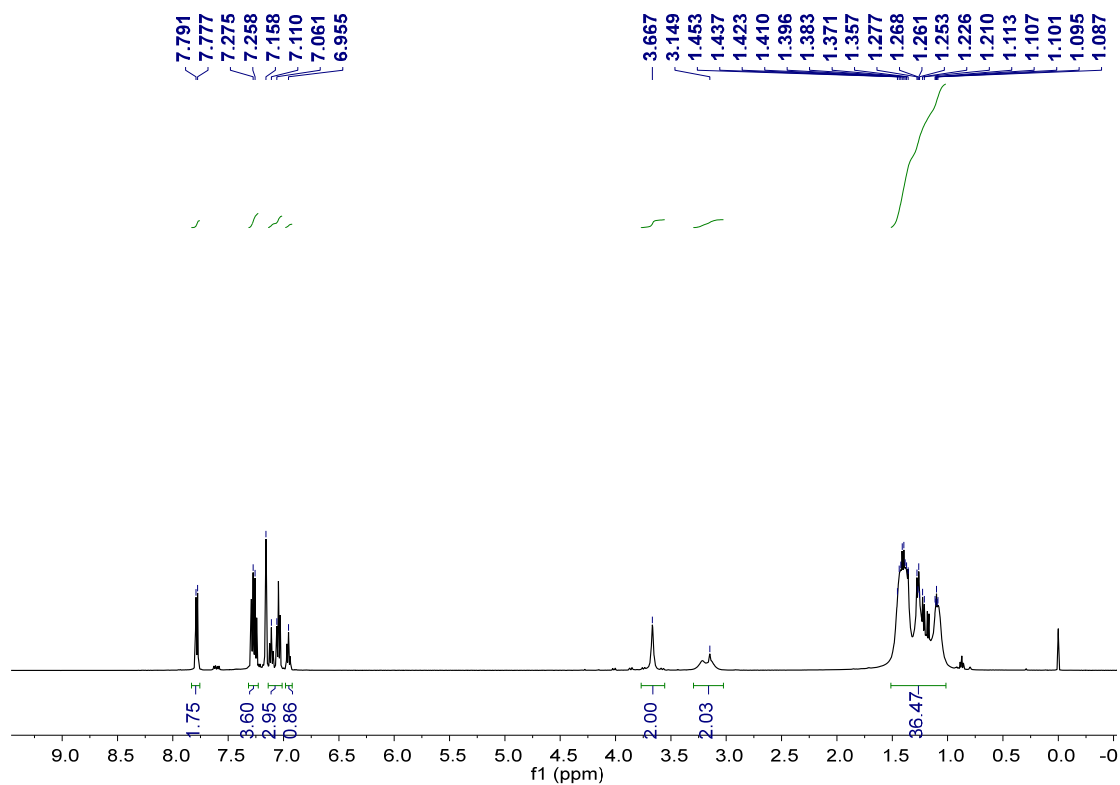

Figure S37.  $^1\text{H}$  NMR (500 MHz,  $\text{C}_6\text{D}_6$ , 25 °C) spectrum of **7**. *Assignments:*  $\delta$  = 6.96-7.79 (m, 10H,  $2\text{C}_6\text{H}_5$ ), 3.67 (d, 2H,  $e\text{-C}_6\text{H}_5\text{CH}_2$ ), 3.15 (s, 2H,  $a\text{-C}_6\text{H}_5\text{CH}_2$ ), 1.09-1.45 (m, 36H,  $12\text{CH}_3$ ) ppm.

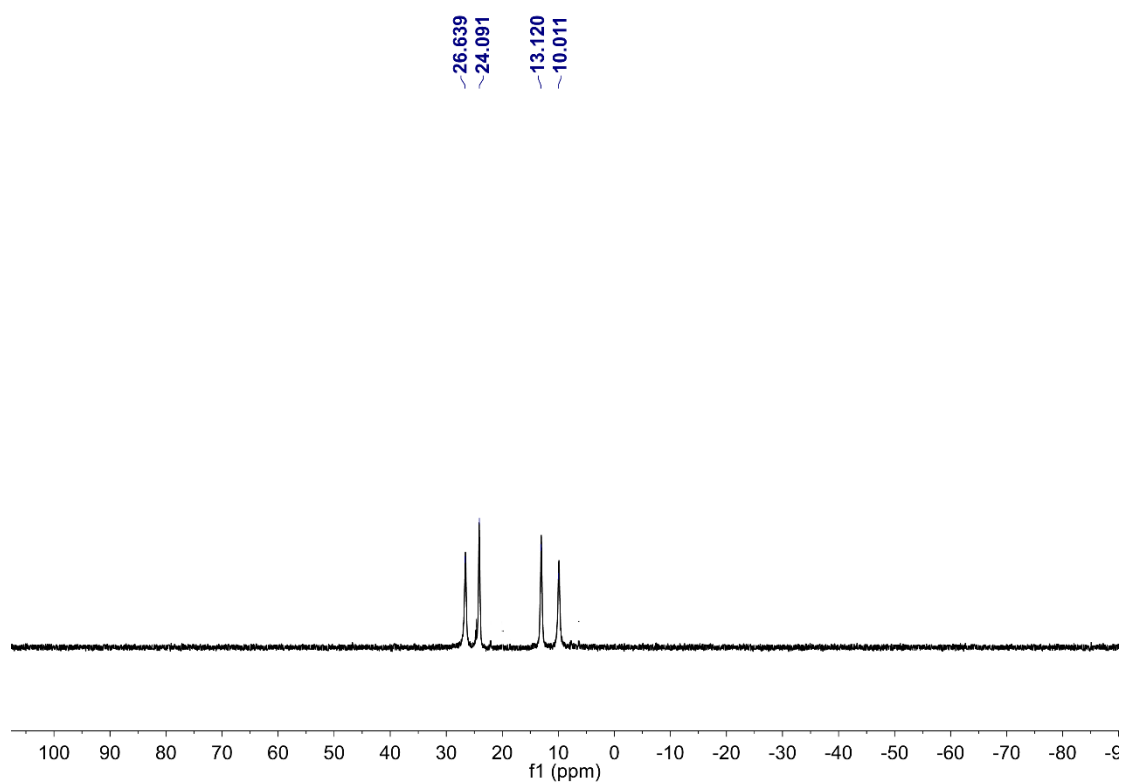

Figure S38.  $^{31}\text{P}$  NMR (202 MHz,  $\text{C}_6\text{D}_6$ , 25  $^\circ\text{C}$ ) spectrum of **7**. Assignments:  $\delta = 26.6$  (s), 24.1 (s), 13.1 (s), 10.0 (s).

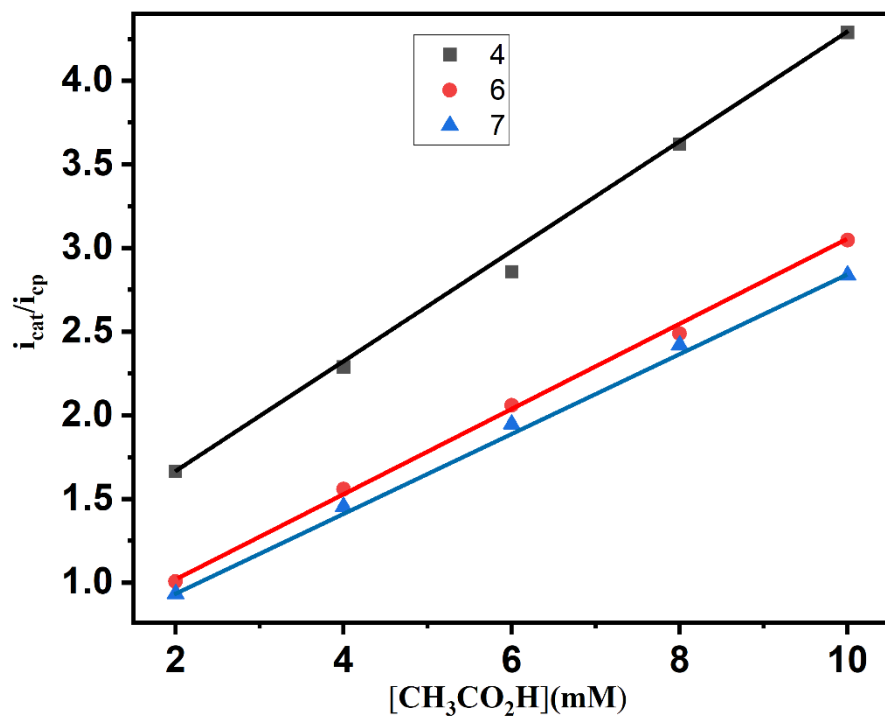

Figure S39. Plots of  $i_{\text{cat}}$  ( $\mu\text{A}$ ) vs  $[\text{HOAc}]$  (mM) for a solution of **4**, **6** and **7** (1.0 mM) with 0.1 M  $n\text{-Bu}_4\text{NPF}_6/\text{MeCN}$  at a scan rate of 0.1  $\text{V s}^{-1}$ .

Table S1. Crystal data and structure refinement parameters for compounds **1-3**.

| Compound                                | <b>1</b>                                                                        | <b>2</b>                                                                        | <b>3-syn</b>                                                                                  | <b>3-anti</b>                                                                                 |
|-----------------------------------------|---------------------------------------------------------------------------------|---------------------------------------------------------------------------------|-----------------------------------------------------------------------------------------------|-----------------------------------------------------------------------------------------------|
| Mol formula                             | C <sub>30</sub> H <sub>32</sub> FeO <sub>2</sub> P <sub>2</sub> Se <sub>2</sub> | C <sub>20</sub> H <sub>28</sub> FeO <sub>2</sub> P <sub>2</sub> Se <sub>2</sub> | C <sub>34</sub> H <sub>36</sub> Fe <sub>2</sub> O <sub>4</sub> P <sub>2</sub> Se <sub>2</sub> | C <sub>34</sub> H <sub>36</sub> Fe <sub>2</sub> O <sub>4</sub> P <sub>2</sub> Se <sub>2</sub> |
| Mol wt                                  | 700.26                                                                          | 576.13                                                                          | 840.19                                                                                        | 840.19                                                                                        |
| Wavelength (Å)                          | 0.71073                                                                         | 0.71073                                                                         | 1.54178                                                                                       | 0.71073                                                                                       |
| Cryst syst                              | Triclinic                                                                       | Triclinic                                                                       | Monoclinic                                                                                    | Monoclinic                                                                                    |
| Space group                             | P-1                                                                             | P-1                                                                             | P21/c                                                                                         | P 21/n                                                                                        |
| <i>a</i> /Å                             | 9.5662(8)                                                                       | 11.7653(12)                                                                     | 21.2567(5)                                                                                    | 9.1562(9)                                                                                     |
| <i>b</i> /Å                             | 10.8574(9)                                                                      | 14.8573(15)                                                                     | 20.1481(5)                                                                                    | 18.9496(16)                                                                                   |
| <i>c</i> /Å                             | 15.7815(13)                                                                     | 15.8567(16)                                                                     | 17.2656(5)                                                                                    | 20.2164(18)                                                                                   |
| $\alpha$ /deg                           | 76.313(2)                                                                       | 112.254(5)                                                                      | 90                                                                                            | 90                                                                                            |
| $\beta$ /deg                            | 88.635(3)                                                                       | 92.185(2)                                                                       | 90.004(2)                                                                                     | 97.088(2)                                                                                     |
| $\gamma$ /deg                           | 77.739(2)                                                                       | 96.229(3)                                                                       | 90                                                                                            | 90                                                                                            |
| <i>V</i> /Å <sup>3</sup>                | 1555.7(2)                                                                       | 2540.7(5)                                                                       | 7394.5(3)                                                                                     | 3480.9(5)                                                                                     |
| Z                                       | 2                                                                               | 4                                                                               | 8                                                                                             | 4                                                                                             |
| <i>D<sub>c</sub></i> /gcm <sup>-3</sup> | 1.495                                                                           | 1.506                                                                           | 1.509                                                                                         | 1.603                                                                                         |
| abs coeff/mm <sup>-1</sup>              | 2.952                                                                           | 3.596                                                                           | 9.635                                                                                         | 8.130                                                                                         |
| F(000)                                  | 704                                                                             | 1152                                                                            | 3376                                                                                          | 1688                                                                                          |
| index ranges                            | -11 ≤ <i>h</i> ≤ 10<br>-12 ≤ <i>k</i> ≤ 12<br>-17 ≤ <i>l</i> ≤ 18               | -13 ≤ <i>h</i> ≤ 13<br>-17 ≤ <i>k</i> ≤ 17<br>-18 ≤ <i>l</i> ≤ 12               | -25 ≤ <i>h</i> ≤ 25<br>-23 ≤ <i>k</i> ≤ 23<br>-20 ≤ <i>l</i> ≤ 19                             | -10 ≤ <i>h</i> ≤ 10<br>-22 ≤ <i>k</i> ≤ 22<br>-16 ≤ <i>l</i> ≤ 24                             |
| no. of reflns                           | 7877                                                                            | 12842                                                                           | 48505                                                                                         | 17475                                                                                         |
| no. of indepreflns                      | 5374                                                                            | 8768                                                                            | 12916                                                                                         | 6093                                                                                          |
| Goodness of fit                         | 1.048                                                                           | 1.066                                                                           | 1.073                                                                                         | 0.977                                                                                         |
| R                                       | 0.0522                                                                          | 0.0574                                                                          | 0.0635                                                                                        | 0.0522                                                                                        |
| R <sub>w</sub>                          | 0.1310                                                                          | 0.1344                                                                          | 0.1756                                                                                        | 0.1089                                                                                        |

Table S2. Crystal data and structure refinement parameters for compounds 4-7.

| Compound                                | 4-syn                                                                                         | 4-anti                                                                                        | 5                                                                                             | 6                                                                                             | 7                                                                                             |
|-----------------------------------------|-----------------------------------------------------------------------------------------------|-----------------------------------------------------------------------------------------------|-----------------------------------------------------------------------------------------------|-----------------------------------------------------------------------------------------------|-----------------------------------------------------------------------------------------------|
| Mol formula                             | C <sub>24</sub> H <sub>32</sub> Fe <sub>2</sub> O <sub>4</sub> P <sub>2</sub> Se <sub>2</sub> | C <sub>24</sub> H <sub>32</sub> Fe <sub>2</sub> O <sub>4</sub> P <sub>2</sub> Se <sub>2</sub> | C <sub>41</sub> H <sub>47</sub> Fe <sub>2</sub> O <sub>3</sub> P <sub>3</sub> Se <sub>2</sub> | C <sub>26</sub> H <sub>41</sub> Fe <sub>2</sub> O <sub>3</sub> P <sub>3</sub> Se <sub>2</sub> | C <sub>28</sub> H <sub>50</sub> Fe <sub>2</sub> O <sub>2</sub> P <sub>4</sub> Se <sub>2</sub> |
| Mol wt                                  | 716.05                                                                                        | 716.05                                                                                        | 950.31                                                                                        | 764.12                                                                                        | 812.18                                                                                        |
| Wavelength (Å)                          | 0.71073                                                                                       | 0.71073                                                                                       | 0.71073                                                                                       | 0.71073                                                                                       | 0.71073                                                                                       |
| Cryst syst                              | Monoclinic                                                                                    | Orthorhombic                                                                                  | Triclinic                                                                                     | Monoclinic                                                                                    | Orthorhombic                                                                                  |
| Space group                             | P21/n                                                                                         | P2(1)2(1)2(1)                                                                                 | P-1                                                                                           | P21/n                                                                                         | Pbca                                                                                          |
| <i>a</i> /Å                             | 10.6496(9)                                                                                    | 11.5785(11)                                                                                   | 9.4986(9)                                                                                     | 23.261(3)                                                                                     | 15.6555(15)                                                                                   |
| <i>b</i> /Å                             | 13.5686(12)                                                                                   | 15.9720(13)                                                                                   | 10.0483(11)                                                                                   | 12.4950(13)                                                                                   | 11.3257(12)                                                                                   |
| <i>c</i> /Å                             | 20.9799(18)                                                                                   | 16.1003(14)                                                                                   | 24.425(2)                                                                                     | 25.607(3)                                                                                     | 42.587(4)                                                                                     |
| $\alpha$ /deg                           | 90                                                                                            | 90                                                                                            | 94.422(2)                                                                                     | 90                                                                                            | 90                                                                                            |
| $\beta$ /deg                            | 103.421(3)                                                                                    | 90                                                                                            | 96.009(2)                                                                                     | 106.916(3)                                                                                    | 90                                                                                            |
| $\gamma$ /deg                           | 90                                                                                            | 90                                                                                            | 105.156(3)                                                                                    | 90                                                                                            | 90                                                                                            |
| <i>V</i> /Å <sup>3</sup>                | 2948.8(4)                                                                                     | 2977.5(5)                                                                                     | 2224.5(4)                                                                                     | 7120.8(13)                                                                                    | 7551.1(13)                                                                                    |
| Z                                       | 4                                                                                             | 4                                                                                             | 2                                                                                             | 8                                                                                             | 8                                                                                             |
| <i>D<sub>c</sub></i> /gcm <sup>-3</sup> | 1.613                                                                                         | 1.597                                                                                         | 1.419                                                                                         | 1.426                                                                                         | 1.429                                                                                         |
| abs coeff/mm <sup>-1</sup>              | 3.587                                                                                         | 3.553                                                                                         | 2.430                                                                                         | 3.017                                                                                         | 2.888                                                                                         |
| F(000)                                  | 1432                                                                                          | 1432                                                                                          | 964                                                                                           | 3088                                                                                          | 3312                                                                                          |
| index ranges                            | -12 ≤ <i>h</i> ≤ 12<br>-15 ≤ <i>k</i> ≤ 16<br>-15 ≤ <i>l</i> ≤ 24                             | -13 ≤ <i>h</i> ≤ 13<br>-18 ≤ <i>k</i> ≤ 13<br>-19 ≤ <i>l</i> ≤ 19                             | -10 ≤ <i>h</i> ≤ 11<br>-11 ≤ <i>k</i> ≤ 8<br>-26 ≤ <i>l</i> ≤ 29                              | -21 ≤ <i>h</i> ≤ 27<br>-14 ≤ <i>k</i> ≤ 13<br>-30 ≤ <i>l</i> ≤ 21                             | -18 ≤ <i>h</i> ≤ 18<br>-13 ≤ <i>k</i> ≤ 13<br>-50 ≤ <i>l</i> ≤ 41                             |
| no. of reflns                           | 14423                                                                                         | 14350                                                                                         | 10744                                                                                         | 34977                                                                                         | 34800                                                                                         |
| no. of indepreflns                      | 5167                                                                                          | 5244                                                                                          | 7577                                                                                          | 12525                                                                                         | 6660                                                                                          |
| Goodness of fit                         | 1.008                                                                                         | 0.859                                                                                         | 1.067                                                                                         | 1.058                                                                                         | 1.163                                                                                         |
| R                                       | 0.0620                                                                                        | 0.0331                                                                                        | 0.0892                                                                                        | 0.0730                                                                                        | 0.0808                                                                                        |
| R <sub>w</sub>                          | 0.1712                                                                                        | 0.0592                                                                                        | 0.1946                                                                                        | 0.1857                                                                                        | 0.1771                                                                                        |

Table S3

Selected bond lengths (Å) and angles (°) for **1**.

| Compound <b>1</b> |            |                   |            |
|-------------------|------------|-------------------|------------|
| Se(1)-C(19)       | 1.939(6)   | Fe(1)-C(1)        | 1.766(6)   |
| Se(1)-Fe(1)       | 2.4891(9)  | Fe(1)-C(2)        | 1.792(7)   |
| Se(2)-C(25)       | 1.950(6)   | Fe(1)-P(1)        | 2.2989(15) |
| Se(2)-Fe(1)       | 2.5062(9)  | Fe(1)-P(2)        | 2.3119(16) |
| C(1)-Fe(1)-C(2)   | 90.6(2)    | P(1)-Fe(1)-Se(1)  | 83.86(4)   |
| C(1)-Fe(1)-P(1)   | 91.07(17)  | P(2)-Fe(1)-Se(1)  | 88.31(5)   |
| C(2)-Fe(1)-P(1)   | 93.76(18)  | C(1)-Fe(1)-Se(2)  | 176.77(17) |
| C(1)-Fe(1)-P(2)   | 90.29(17)  | C(2)-Fe(1)-Se(2)  | 87.73(16)  |
| C(2)-Fe(1)-P(2)   | 93.94(18)  | P(1)-Fe(1)-Se(2)  | 91.80(4)   |
| P(1)-Fe(1)-P(2)   | 172.17(6)  | P(2)-Fe(1)-Se(2)  | 87.07(5)   |
| C(1)-Fe(1)-Se(1)  | 97.91(17)  | Se(1)-Fe(1)-Se(2) | 83.87(3)   |
| C(2)-Fe(1)-Se(1)  | 171.19(16) |                   |            |

Table S4

Selected bond lengths (Å) and angles (°) for **2**.

| Compound <b>2</b> |           |                  |          |
|-------------------|-----------|------------------|----------|
| Fe(1)-C(2)        | 1.758(7)  | Fe(1)-C(2)       | 1.758(7) |
| Fe(1)-C(1)        | 1.779(8)  | Fe(1)-C(1)       | 1.779(8) |
| Fe(1)-P(2)        | 2.299(2)  | Fe(1)-P(2)       | 2.299(2) |
| Fe(1)-P(1)        | 2.310(2)  | Fe(1)-P(1)       | 2.310(2) |
| C(2)-Fe(1)-C(1)   | 93.5(3)   | C(1)-Fe(1)-Se(1) | 169.6(2) |
| C(2)-Fe(1)-P(2)   | 89.5(2)   | P(2)-Fe(1)-Se(1) | 84.61(6) |
| C(1)-Fe(1)-P(2)   | 93.3(2)   | P(1)-Fe(1)-Se(1) | 89.58(6) |
| C(2)-Fe(1)-P(1)   | 91.1(2)   | C(2)-Fe(1)-Se(2) | 178.3(2) |
| C(1)-Fe(1)-P(1)   | 92.4(2)   | C(1)-Fe(1)-Se(2) | 87.5(2)  |
| P(2)-Fe(1)-P(1)   | 174.18(8) | P(2)-Fe(1)-Se(2) | 91.76(7) |
| C(2)-Fe(1)-Se(1)  | 96.7(2)   | P(1)-Fe(1)-Se(2) | 87.50(6) |

Table S5

Selected bond lengths (Å) and angles (°) for **3-syn**.

| Compound <b>3-syn</b> |            |             |            |
|-----------------------|------------|-------------|------------|
| Se(1)-C(21)           | 1.985(6)   | Fe(1)-C(2)  | 1.741(7)   |
| Se(1)-Fe(2)           | 2.3778(10) | Fe(1)-C(1)  | 1.759(7)   |
| Se(1)-Fe(1)           | 2.3961(11) | Fe(1)-P(1)  | 2.2239(18) |
| Se(2)-C(28)           | 1.995(7)   | Fe(1)-Fe(2) | 2.5517(13) |
| Se(2)-Fe(2)           | 2.4027(11) | Fe(2)-C(4)  | 1.749(7)   |
| Se(2)-Fe(1)           | 2.4066(11) | Fe(2)-P(2)  | 2.2225(19) |



|                   |           |                   |           |
|-------------------|-----------|-------------------|-----------|
| C(2)-Fe(1)-C(1)   | 91.1(3)   | C(4)-Fe(2)-C(3)   | 92.6(3)   |
| C(2)-Fe(1)-P(1)   | 98.0(2)   | C(4)-Fe(2)-P(2)   | 95.7(3)   |
| C(1)-Fe(1)-P(1)   | 98.1(2)   | C(3)-Fe(2)-P(2)   | 99.9(2)   |
| C(2)-Fe(1)-Se(1)  | 94.3(2)   | C(4)-Fe(2)-Se(1)  | 92.3(2)   |
| C(1)-Fe(1)-Se(1)  | 160.9(2)  | C(3)-Fe(2)-Se(1)  | 159.1(2)  |
| P(1)-Fe(1)-Se(1)  | 99.30(5)  | P(2)-Fe(2)-Se(1)  | 99.80(5)  |
| C(2)-Fe(1)-Se(2)  | 156.3(2)  | C(4)-Fe(2)-Se(2)  | 158.4(3)  |
| C(1)-Fe(1)-Se(2)  | 92.7(2)   | C(3)-Fe(2)-Se(2)  | 92.8(2)   |
| P(1)-Fe(1)-Se(2)  | 104.60(6) | P(2)-Fe(2)-Se(2)  | 103.93(6) |
| Se(1)-Fe(1)-Se(2) | 75.30(3)  | Se(1)-Fe(2)-Se(2) | 75.70(3)  |
| C(2)-Fe(1)-Fe(2)  | 98.5(2)   | C(4)-Fe(2)-Fe(1)  | 100.4(3)  |
| C(1)-Fe(1)-Fe(2)  | 103.7(2)  | C(3)-Fe(2)-Fe(1)  | 101.1(2)  |
| P(1)-Fe(1)-Fe(2)  | 152.25(6) | P(2)-Fe(2)-Fe(1)  | 152.82(6) |
| Se(1)-Fe(1)-Fe(2) | 57.34(3)  | Se(1)-Fe(2)-Fe(1) | 58.04(3)  |
| Se(2)-Fe(1)-Fe(2) | 57.88(3)  | Se(2)-Fe(2)-Fe(1) | 58.03(3)  |

Table S6

Selected bond lengths (Å) and angles (°) for **3-anti**.

| Compound <b>3-anti</b> |            |                   |            |
|------------------------|------------|-------------------|------------|
| Se(1)-C(21)            | 1.982(4)   | Fe(1)-C(2)        | 1.739(5)   |
| Se(1)-Fe(2)            | 2.3657(10) | Fe(1)-P(1)        | 2.2046(14) |
| Se(1)-Fe(1)            | 2.3674(8)  | Fe(1)-Fe(2)       | 2.5622(10) |
| Se(2)-C(28)            | 1.957(5)   | Fe(2)-C(3)        | 1.715(6)   |
| Se(2)-Fe(1)            | 2.3542(10) | Fe(2)-C(4)        | 1.746(6)   |
| Se(2)-Fe(2)            | 2.3707(8)  | Fe(2)-P(2)        | 2.2063(16) |
| Fe(1)-C(1)             | 1.707(7)   |                   |            |
| C(1)-Fe(1)-C(2)        | 95.2(3)    | C(3)-Fe(2)-C(4)   | 99.8(3)    |
| C(1)-Fe(1)-P(1)        | 93.4(2)    | C(3)-Fe(2)-P(2)   | 86.71(18)  |
| C(2)-Fe(1)-P(1)        | 100.17(17) | C(4)-Fe(2)-P(2)   | 99.98(19)  |
| C(1)-Fe(1)-Se(2)       | 165.32(19) | C(3)-Fe(2)-Se(1)  | 162.28(19) |
| C(2)-Fe(1)-Se(2)       | 92.50(19)  | C(4)-Fe(2)-Se(1)  | 97.63(19)  |
| P(1)-Fe(1)-Se(2)       | 97.57(5)   | P(2)-Fe(2)-Se(1)  | 93.55(5)   |
| C(1)-Fe(1)-Se(1)       | 85.65(19)  | C(3)-Fe(2)-Se(2)  | 91.00(18)  |
| C(2)-Fe(1)-Se(1)       | 149.71(17) | C(4)-Fe(2)-Se(2)  | 105.50(19) |
| P(1)-Fe(1)-Se(1)       | 110.03(5)  | P(2)-Fe(2)-Se(2)  | 154.44(5)  |
| Se(2)-Fe(1)-Se(1)      | 81.43(3)   | Se(1)-Fe(2)-Se(2) | 81.13(3)   |
| C(1)-Fe(1)-Fe(2)       | 109.33(19) | C(3)-Fe(2)-Fe(1)  | 105.18(18) |
| C(2)-Fe(1)-Fe(2)       | 94.54(17)  | C(4)-Fe(2)-Fe(1)  | 149.16(18) |
| P(1)-Fe(1)-Fe(2)       | 151.68(5)  | P(2)-Fe(2)-Fe(1)  | 99.26(5)   |
| Se(2)-Fe(1)-Fe(2)      | 57.47(3)   | Se(1)-Fe(2)-Fe(1) | 57.26(3)   |
| Se(1)-Fe(1)-Fe(2)      | 57.19(3)   | Se(2)-Fe(2)-Fe(1) | 56.85(3)   |

Table S7

Selected bond lengths (Å) and angles (°) for **4-syn**.

| Compound <b>4-syn</b> |            |                   |            |
|-----------------------|------------|-------------------|------------|
| Se(1)-Fe(1)           | 2.3695(13) | Fe(1)-C(1)        | 1.738(9)   |
| Se(1)-Fe(2)           | 2.3710(13) | Fe(1)-P(1)        | 2.204(2)   |
| Se(2)-C(18)           | 1.961(8)   | Fe(1)-Fe(2)       | 2.5422(14) |
| Se(2)-Fe(1)           | 2.3624(13) | Fe(2)-C(4)        | 1.718(9)   |
| Se(2)-Fe(2)           | 2.3719(13) | Fe(2)-C(3)        | 1.740(9)   |
| Fe(1)-C(2)            | 1.723(10)  | Fe(2)-P(2)        | 2.201(2)   |
| C(2)-Fe(1)-C(1)       | 89.0(4)    | C(4)-Fe(2)-C(3)   | 91.6(4)    |
| C(2)-Fe(1)-P(1)       | 99.9(3)    | C(4)-Fe(2)-P(2)   | 98.4(3)    |
| C(1)-Fe(1)-P(1)       | 98.9(3)    | C(3)-Fe(2)-P(2)   | 97.9(3)    |
| C(2)-Fe(1)-Se(2)      | 160.5(3)   | C(4)-Fe(2)-Se(1)  | 161.4(3)   |
| C(1)-Fe(1)-Se(2)      | 95.0(3)    | C(3)-Fe(2)-Se(1)  | 93.1(3)    |
| P(1)-Fe(1)-Se(2)      | 98.25(8)   | P(2)-Fe(2)-Se(1)  | 98.78(8)   |
| C(2)-Fe(1)-Se(1)      | 92.8(3)    | C(4)-Fe(2)-Se(2)  | 92.3(3)    |
| C(1)-Fe(1)-Se(1)      | 161.5(3)   | C(3)-Fe(2)-Se(2)  | 159.8(3)   |
| P(1)-Fe(1)-Se(1)      | 98.95(8)   | P(2)-Fe(2)-Se(2)  | 101.03(7)  |
| Se(2)-Fe(1)-Se(1)     | 77.51(4)   | Se(1)-Fe(2)-Se(2) | 77.30(4)   |
| C(2)-Fe(1)-Fe(2)      | 102.8(3)   | C(4)-Fe(2)-Fe(1)  | 103.8(3)   |
| C(1)-Fe(1)-Fe(2)      | 104.1(3)   | C(3)-Fe(2)-Fe(1)  | 102.5(3)   |
| P(1)-Fe(1)-Fe(2)      | 147.72(9)  | P(2)-Fe(2)-Fe(1)  | 149.13(8)  |
| Se(2)-Fe(1)-Fe(2)     | 57.70(4)   | Se(1)-Fe(2)-Fe(1) | 57.54(4)   |
| Se(1)-Fe(1)-Fe(2)     | 57.60(4)   | Se(2)-Fe(2)-Fe(1) | 57.34(4)   |

Table S8

Selected bond lengths (Å) and angles (°) for **4-anti**.

| Compound <b>4-anti</b> |            |                  |            |
|------------------------|------------|------------------|------------|
| Se(1)-C(11)            | 1.965(6)   | Fe(1)-C(2)       | 1.735(8)   |
| Se(1)-Fe(1)            | 2.3598(11) | Fe(1)-P(1)       | 2.189(2)   |
| Se(1)-Fe(2)            | 2.3694(11) | Fe(1)-Fe(2)      | 2.5746(12) |
| Se(2)-C(18)            | 1.973(6)   | Fe(2)-C(3)       | 1.724(8)   |
| Se(2)-Fe(1)            | 2.3481(11) | Fe(2)-C(4)       | 1.730(8)   |
| Se(2)-Fe(2)            | 2.3607(11) | Fe(2)-P(2)       | 2.207(2)   |
| Fe(1)-C(1)             | 1.721(8)   |                  |            |
| C(1)-Fe(1)-C(2)        | 104.9(4)   | C(3)-Fe(2)-C(4)  | 90.4(3)    |
| C(1)-Fe(1)-P(1)        | 90.2(2)    | C(3)-Fe(2)-P(2)  | 96.2(2)    |
| C(2)-Fe(1)-P(1)        | 90.7(3)    | C(4)-Fe(2)-P(2)  | 97.4(2)    |
| C(1)-Fe(1)-Se(2)       | 94.1(2)    | C(3)-Fe(2)-Se(2) | 95.4(2)    |
| C(2)-Fe(1)-Se(2)       | 96.1(3)    | C(4)-Fe(2)-Se(2) | 162.9(2)   |
| P(1)-Fe(1)-Se(2)       | 170.71(7)  | P(2)-Fe(2)-Se(2) | 97.97(7)   |
| C(1)-Fe(1)-Se(1)       | 142.6(2)   | C(3)-Fe(2)-Se(1) | 158.6(2)   |
| C(2)-Fe(1)-Se(1)       | 112.5(2)   | C(4)-Fe(2)-Se(1) | 86.6(2)    |
| P(1)-Fe(1)-Se(1)       | 88.93(6)   | P(2)-Fe(2)-Se(1) | 105.21(6)  |

|                   |           |                   |           |
|-------------------|-----------|-------------------|-----------|
| Se(2)-Fe(1)-Se(1) | 82.66(4)  | Se(2)-Fe(2)-Se(1) | 82.19(4)  |
| C(1)-Fe(1)-Fe(2)  | 89.8(2)   | C(3)-Fe(2)-Fe(1)  | 104.2(2)  |
| C(2)-Fe(1)-Fe(2)  | 150.8(3)  | C(4)-Fe(2)-Fe(1)  | 106.3(2)  |
| P(1)-Fe(1)-Fe(2)  | 114.78(7) | P(2)-Fe(2)-Fe(1)  | 148.34(7) |
| Se(2)-Fe(1)-Fe(2) | 57.09(3)  | Se(2)-Fe(2)-Fe(1) | 56.62(3)  |
| Se(1)-Fe(1)-Fe(2) | 57.19(3)  | Se(1)-Fe(2)-Fe(1) | 56.84(3)  |

Table S9

Selected bond lengths (Å) and angles (°) for **5**.

| Compound <b>5</b> |            |                   |            |
|-------------------|------------|-------------------|------------|
| Se(1)-Fe(2)       | 2.4311(19) | Fe(1)-P(2)        | 2.245(4)   |
| Se(1)-Fe(1)       | 2.4509(18) | Fe(1)-P(1)        | 2.256(3)   |
| Se(2)-C(35)       | 2.011(11)  | Fe(1)-Fe(2)       | 2.620(2)   |
| Se(2)-Fe(1)       | 2.4058(17) | Fe(2)-C(3)        | 1.746(13)  |
| Se(2)-Fe(2)       | 2.4182(19) | Fe(2)-C(2)        | 1.762(13)  |
| Fe(1)-C(1)        | 1.753(12)  | Fe(2)-P(3)        | 2.253(3)   |
| C(1)-Fe(1)-P(2)   | 98.8(4)    | C(3)-Fe(2)-C(2)   | 92.1(5)    |
| C(1)-Fe(1)-P(1)   | 88.2(3)    | C(3)-Fe(2)-P(3)   | 93.5(4)    |
| P(2)-Fe(1)-P(1)   | 101.01(12) | C(2)-Fe(2)-P(3)   | 100.9(4)   |
| C(1)-Fe(1)-Se(2)  | 93.4(3)    | C(3)-Fe(2)-Se(2)  | 166.7(4)   |
| P(2)-Fe(1)-Se(2)  | 101.11(10) | C(2)-Fe(2)-Se(2)  | 93.2(4)    |
| P(1)-Fe(1)-Se(2)  | 157.30(11) | P(3)-Fe(2)-Se(2)  | 97.39(10)  |
| C(1)-Fe(1)-Se(1)  | 160.8(4)   | C(3)-Fe(2)-Se(1)  | 88.9(4)    |
| P(2)-Fe(1)-Se(1)  | 100.14(11) | C(2)-Fe(2)-Se(1)  | 147.0(4)   |
| P(1)-Fe(1)-Se(1)  | 91.23(9)   | P(3)-Fe(2)-Se(1)  | 111.97(11) |
| Se(2)-Fe(1)-Se(1) | 79.89(6)   | Se(2)-Fe(2)-Se(1) | 80.04(6)   |
| C(1)-Fe(1)-Fe(2)  | 104.1(4)   | C(3)-Fe(2)-Fe(1)  | 110.9(4)   |
| P(2)-Fe(1)-Fe(2)  | 149.04(11) | C(2)-Fe(2)-Fe(1)  | 91.2(4)    |
| P(1)-Fe(1)-Fe(2)  | 100.31(10) | P(3)-Fe(2)-Fe(1)  | 152.37(11) |
| Se(2)-Fe(1)-Fe(2) | 57.33(5)   | Se(2)-Fe(2)-Fe(1) | 56.88(5)   |
| Se(1)-Fe(1)-Fe(2) | 57.18(5)   | Se(1)-Fe(2)-Fe(1) | 57.91(5)   |

Table S10

Selected bond lengths (Å) and angles (°) for **6**.

| Compound <b>6</b> |            |             |            |
|-------------------|------------|-------------|------------|
| Se(1)-Fe(2)       | 2.4206(15) | Se(3)-Fe(4) | 2.4136(16) |
| Se(1)-Fe(1)       | 2.4216(15) | Se(3)-Fe(3) | 2.4171(16) |
| Se(2)-Fe(2)       | 2.4529(15) | Se(4)-Fe(3) | 2.4265(17) |
| Se(2)-Fe(1)       | 2.4702(14) | Se(4)-Fe(4) | 2.4553(16) |
| Fe(1)-C(1)        | 1.726(10)  | Fe(3)-P(6)  | 2.268(3)   |
| Fe(1)-P(2)        | 2.239(3)   | Fe(3)-Fe(4) | 2.6290(19) |
| Fe(1)-P(1)        | 2.248(3)   | Fe(4)-C(27) | 1.772(10)  |
| Fe(1)-Fe(2)       | 2.6342(17) | Fe(4)-P(5)  | 2.247(3)   |
| Fe(2)-C(3)        | 1.793(10)  | Fe(4)-P(4)  | 2.247(3)   |

|                   |            |                   |           |
|-------------------|------------|-------------------|-----------|
| Fe(2)-C(2)        | 1.796(11)  | Fe(3)-C(28)       | 1.772(12) |
| Fe(2)-P(3)        | 2.259(3)   | Fe(3)-C(29)       | 1.772(11) |
| C(1)-Fe(1)-P(2)   | 85.9(3)    | C(3)-Fe(2)-C(2)   | 91.9(4)   |
| C(1)-Fe(1)-P(1)   | 96.5(3)    | C(3)-Fe(2)-P(3)   | 100.2(3)  |
| P(2)-Fe(1)-P(1)   | 101.04(11) | C(2)-Fe(2)-P(3)   | 92.9(3)   |
| C(1)-Fe(1)-Se(1)  | 94.5(3)    | C(3)-Fe(2)-Se(1)  | 93.0(3)   |
| P(2)-Fe(1)-Se(1)  | 156.40(9)  | C(2)-Fe(2)-Se(1)  | 166.9(3)  |
| P(1)-Fe(1)-Se(1)  | 102.36(9)  | P(3)-Fe(2)-Se(1)  | 98.10(9)  |
| C(1)-Fe(1)-Se(2)  | 162.7(3)   | C(3)-Fe(2)-Se(2)  | 151.1(3)  |
| P(2)-Fe(1)-Se(2)  | 92.58(8)   | C(2)-Fe(2)-Se(2)  | 89.4(3)   |
| P(1)-Fe(1)-Se(2)  | 100.76(8)  | P(3)-Fe(2)-Se(2)  | 108.58(8) |
| Se(1)-Fe(1)-Se(2) | 80.06(5)   | Se(1)-Fe(2)-Se(2) | 80.42(5)  |
| C(1)-Fe(1)-Fe(2)  | 105.9(3)   | C(3)-Fe(2)-Fe(1)  | 94.8(3)   |
| P(2)-Fe(1)-Fe(2)  | 100.13(9)  | C(2)-Fe(2)-Fe(1)  | 110.5(3)  |
| P(1)-Fe(1)-Fe(2)  | 150.10(9)  | P(3)-Fe(2)-Fe(1)  | 151.76(9) |
| Se(1)-Fe(1)-Fe(2) | 57.02(4)   | Se(1)-Fe(2)-Fe(1) | 57.06(4)  |
| Se(2)-Fe(1)-Fe(2) | 57.33(4)   | Se(2)-Fe(2)-Fe(1) | 57.97(4)  |

Table S11

Selected bond lengths (Å) and angles (°) for 7.

| Compound 7        |            |                   |            |
|-------------------|------------|-------------------|------------|
| Se(1)-C(15)       | 2.013(9)   | Fe(1)-P(1)        | 2.232(3)   |
| Se(1)-Fe(1)       | 2.4039(15) | Fe(1)-P(2)        | 2.243(3)   |
| Se(1)-Fe(2)       | 2.4319(15) | Fe(1)-Fe(2)       | 2.7197(17) |
| Se(2)-C(22)       | 2.022(9)   | Fe(2)-C(2)        | 1.712(10)  |
| Se(2)-Fe(1)       | 2.4214(15) | Fe(2)-P(3)        | 2.234(3)   |
| Se(2)-Fe(2)       | 2.4365(15) | Fe(2)-P(4)        | 2.240(3)   |
| Fe(1)-C(1)        | 1.745(11)  |                   |            |
| C(1)-Fe(1)-P(1)   | 86.1(3)    | C(2)-Fe(2)-P(3)   | 90.0(3)    |
| C(1)-Fe(1)-P(2)   | 96.4(3)    | C(2)-Fe(2)-P(4)   | 94.2(4)    |
| P(1)-Fe(1)-P(2)   | 101.89(11) | P(3)-Fe(2)-P(4)   | 97.72(11)  |
| C(1)-Fe(1)-Se(1)  | 94.9(3)    | C(2)-Fe(2)-Se(1)  | 159.2(3)   |
| P(1)-Fe(1)-Se(1)  | 156.19(10) | P(3)-Fe(2)-Se(1)  | 97.56(9)   |
| P(2)-Fe(1)-Se(1)  | 101.65(9)  | P(4)-Fe(2)-Se(1)  | 103.83(9)  |
| C(1)-Fe(1)-Se(2)  | 163.4(3)   | C(2)-Fe(2)-Se(2)  | 87.7(3)    |
| P(1)-Fe(1)-Se(2)  | 91.89(8)   | P(3)-Fe(2)-Se(2)  | 164.02(10) |
| P(2)-Fe(1)-Se(2)  | 100.10(8)  | P(4)-Fe(2)-Se(2)  | 98.22(9)   |
| Se(1)-Fe(1)-Se(2) | 80.48(5)   | Se(1)-Fe(2)-Se(2) | 79.63(5)   |
| C(1)-Fe(1)-Fe(2)  | 108.0(3)   | C(2)-Fe(2)-Fe(1)  | 104.0(3)   |
| P(1)-Fe(1)-Fe(2)  | 100.80(9)  | P(3)-Fe(2)-Fe(1)  | 109.76(9)  |
| P(2)-Fe(1)-Fe(2)  | 147.57(9)  | P(4)-Fe(2)-Fe(1)  | 146.71(9)  |
| Se(1)-Fe(1)-Fe(2) | 56.27(4)   | Se(1)-Fe(2)-Fe(1) | 55.29(4)   |
| Se(2)-Fe(1)-Fe(2) | 56.22(4)   | Se(2)-Fe(2)-Fe(1) | 55.69(4)   |
